# Supplementary material for: Bisphenol A Exposure Changes the Transcriptomic and Proteomic Dynamics of Human Retinoblastoma Y79 Cells
Source: MDPI journal article supplement (doi:10.3390/genes12020264), 2021-02-11
Supplement: s1 [file Supplementary Table S2.xlsx]

## Sheet: DETs
Transcript_ID	Chr	Gene_ID	Gene_type	Gene_name	Trans_type	Trans_name	Length	FPKM_DMSO01	FPKM_DMSO02	FPKM_BPA01	FPKM_BPA02	P.Value	adj.P.Val	AVR_CTL	AVR_BPA	SD_CTL	SD_BPA
ENST00000261772.12	chr16	ENSG00000090861	protein_coding	AARS	protein_coding	AARS-201	3477	150.269	132.269	335.984	323.217	0.000262647	0.0113555	141.269	329.601	12.7279	9.02722
ENST00000392676.8	chr17	ENSG00000154265	protein_coding	ABCA5	protein_coding	ABCA5-201	8252	4.21805	4.3347	1.44492	1.2832	0.000163211	0.0113555	4.27637	1.36406	0.0824812	0.11435
ENST00000432130.1	chr22	ENSG00000223831	lncRNA	AC005006.1	lncRNA	AC005006.1-201	249	4.50931	4.10441	1.14013	1.11911	0.000157119	0.0113555	4.30686	1.12962	0.286308	0.0148641
ENST00000620729.1	chr17	ENSG00000274341	lncRNA	AC005899.6	lncRNA	AC005899.6-201	297	2.52036	2.29405	5.73519	6.56769	0.00231202	0.0113555	2.4072	6.15144	0.160024	0.588666
ENST00000653434.1	chr3	ENSG00000230084	lncRNA	AC006059.1	lncRNA	AC006059.1-204	2425	3.5498	3.51202	11.5898	11.9507	1.81685e-05	0.0113555	3.53091	11.7703	0.0267165	0.255171
ENST00000603816.1	chr17	ENSG00000271392	lncRNA	AC006237.1	lncRNA	AC006237.1-201	480	2.3392	2.12916	6.50586	5.80537	0.000917822	0.0113555	2.23418	6.15562	0.148522	0.49532
ENST00000600669.1	chr19	ENSG00000269194	lncRNA	AC006942.1	lncRNA	AC006942.1-201	520	6.4778	7.2064	2.72973	2.6794	0.000724485	0.0113555	6.8421	2.70457	0.515197	0.0355881
ENST00000516664.1	chr2	ENSG00000252473	snoRNA	AC007684.1	snoRNA	AC007684.1-201	135	2.77239	2.52345	8.41162	8.25653	0.000208241	0.0113555	2.64792	8.33407	0.176026	0.109664
ENST00000412295.2	chr5	ENSG00000248103	lncRNA	AC008443.3	lncRNA	AC008443.3-201	549	0.681735	0.620521	3.10265	3.04544	6.34134e-05	0.0113555	0.651128	3.07404	0.0432852	0.0404499
ENST00000622195.1	chr5	ENSG00000274525	unprocessed_pseudogene	AC008443.7	unprocessed_pseudogene	AC008443.7-201	246	6.08574	6.92411	20.7726	21.5224	0.000268994	0.0113555	6.50492	21.1475	0.592817	0.530162
ENST00000570267.2	chr16	ENSG00000259877	lncRNA	AC009113.1	lncRNA	AC009113.1-201	2443	12.2562	13.3868	4.29963	3.87817	0.00042858	0.0113555	12.8215	4.0889	0.799472	0.298021
ENST00000450566.1	chr7	ENSG00000238072	processed_pseudogene	AC009244.1	processed_pseudogene	AC009244.1-201	258	145.067	133.361	67.1218	68.0444	0.000117195	0.0113555	139.214	67.5831	8.27701	0.652367
ENST00000583287.1	chr18	ENSG00000263982	lncRNA	AC009716.1	lncRNA	AC009716.1-201	398	53.6019	48.7888	164.772	161.033	2.53965e-05	0.0113555	51.1954	162.902	3.40332	2.64324
ENST00000552576.2	chr12	ENSG00000258056	lncRNA	AC009779.2	lncRNA	AC009779.2-201	1443	15.5623	13.6927	3.93475	4.44153	0.000355935	0.0113555	14.6275	4.18814	1.32196	0.35835
ENST00000606639.1	chr2	ENSG00000272180	lncRNA	AC011306.1	lncRNA	AC011306.1-201	1275	22.6031	21.1079	8.68376	8.08654	7.83114e-05	0.0113555	21.8555	8.38515	1.05727	0.422296
ENST00000560380.1	chr15	ENSG00000259298	lncRNA	AC012170.2	lncRNA	AC012170.2-201	667	4.48903	5.10744	16.5994	15.04	0.000615472	0.0113555	4.79823	15.8197	0.43728	1.10265
ENST00000615706.1	chr2	ENSG00000277809	misc_RNA	AC012354.9	misc_RNA	AC012354.9-201	324	2.31033	2.10288	7.88589	6.88044	0.001071	0.0113555	2.2066	7.38317	0.146689	0.710961
ENST00000609422.1	chr2	ENSG00000273302	lncRNA	AC016747.3	lncRNA	AC016747.3-201	791	1.89266	1.72271	5.38354	5.98885	0.000681838	0.0113555	1.80768	5.6862	0.12017	0.428021
ENST00000662124.1	chr7	ENSG00000286456	lncRNA	AC016769.5	lncRNA	AC016769.5-201	1285	23.301	22.5343	10.1627	11.4933	0.000550906	0.0113555	22.9177	10.828	0.542139	0.940881
ENST00000605778.1	chr7	ENSG00000271122	lncRNA	AC018647.2	lncRNA	AC018647.2-201	4200	12.2975	12.0855	5.00191	4.37891	0.000239736	0.0113555	12.1915	4.69041	0.149908	0.440527
ENST00000602706.1	chr16	ENSG00000270184	lncRNA	AC018695.4	lncRNA	AC018695.4-201	689	6.51854	6.9221	21.8379	20.6263	0.000122709	0.0113555	6.72032	21.2321	0.285358	0.856667
ENST00000383808.7	chr3	ENSG00000206567	lncRNA	AC022007.1	lncRNA	AC022007.1-201	4187	33.4316	31.7315	12.3402	13.3106	8.3717e-05	0.0113555	32.5815	12.8254	1.20214	0.686201
ENST00000588658.1	chr19	ENSG00000267169	lncRNA	AC022098.1	lncRNA	AC022098.1-202	686	2.72794	2.48299	8.27674	8.12414	4.54712e-05	0.0113555	2.60546	8.20044	0.173204	0.107906
ENST00000624833.1	chr5	ENSG00000280187	TEC	AC022107.1	TEC	AC022107.1-201	3094	4.47579	4.73453	1.74336	1.80128	0.000191843	0.0113555	4.60516	1.77232	0.182958	0.0409563
ENST00000564832.1	chr8	ENSG00000260838	lncRNA	AC022893.2	lncRNA	AC022893.2-201	3296	7.49454	6.71823	16.1067	16.7398	0.000218964	0.0113555	7.10638	16.4233	0.548933	0.447613
ENST00000641839.1	chr8	ENSG00000283674	lncRNA	AC068587.4	lncRNA	AC068587.4-203	5619	28.8414	25.3423	4.24398	4.66165	0.000149945	0.0113555	27.0919	4.45282	2.47427	0.295339
ENST00000427545.1	chr7	ENSG00000234338	processed_pseudogene	AC073349.2	processed_pseudogene	AC073349.2-201	1603	11.6741	12.5385	51.3591	48.1524	0.000103332	0.0113555	12.1063	49.7557	0.611233	2.26754
ENST00000428041.4	chr15	ENSG00000285077	protein_coding	AC091057.6	protein_coding	AC091057.6-203	3256	4.94279	5.44061	1.831	1.96841	0.000590253	0.0113555	5.1917	1.8997	0.352012	0.0971613
ENST00000563750.1	chr16	ENSG00000272923	lncRNA	AC092139.1	lncRNA	AC092139.1-201	754	15.3879	15.3616	36.8984	39.9139	0.000324691	0.0113555	15.3747	38.4061	0.0185794	2.13222
ENST00000525575.1	chr3	ENSG00000255021	lncRNA	AC093496.1	lncRNA	AC093496.1-201	613	0.610559	0.555736	2.3156	2.2729	0.000103279	0.0113555	0.583147	2.29425	0.038766	0.0301889
ENST00000579042.2	chr4	ENSG00000281369	pseudogene	AC093826.2	pseudogene	AC093826.2-201	108	10.3965	9.46294	2.62863	2.58017	0.000157119	0.0113555	9.9297	2.6044	0.660099	0.03427
ENST00000519541.1	chr7	ENSG00000205236	protein_coding	AC105052.1	nonsense_mediated_decay	AC105052.1-201	3569	13.5279	13.2677	4.29537	4.1381	3.46064e-06	0.0113555	13.3978	4.21673	0.183981	0.111209
ENST00000531565.1	chr8	ENSG00000181097	lncRNA	AC105219.1	lncRNA	AC105219.1-201	1963	1.71597	1.56189	4.33865	4.54256	0.000156865	0.0113555	1.63893	4.4406	0.108952	0.144191
ENST00000562894.1	chr15	ENSG00000260361	lncRNA	AC106028.3	lncRNA	AC106028.3-201	1736	4.0963	3.92472	1.14473	1.28414	0.000107346	0.0113555	4.01051	1.21443	0.121325	0.0985787
ENST00000561847.2	chr16	ENSG00000260293	lncRNA	AC106820.4	lncRNA	AC106820.4-201	5616	138.22	143.703	64.5531	71.4507	0.00066217	0.0113555	140.961	68.0019	3.87751	4.87736
ENST00000581673.1	chr17	ENSG00000264660	lncRNA	AC107926.1	lncRNA	AC107926.1-201	621	4.21886	3.84004	9.60022	10.3207	0.000466304	0.0113555	4.02945	9.96044	0.267866	0.509432
ENST00000545152.1	chr16	ENSG00000205746	transcribed_unprocessed_pseudogene	AC126755.1	lncRNA	AC126755.1-202	586	7.66429	8.13878	31.0053	29.9581	4.00396e-05	0.0113555	7.90153	30.4817	0.335515	0.74047
ENST00000501520.1	chr16	ENSG00000246465	lncRNA	AC138904.1	lncRNA	AC138904.1-201	2481	20.6672	18.6742	8.81084	7.74986	0.00059271	0.0113555	19.6707	8.28035	1.40931	0.750228
ENST00000568218.2	chr15	ENSG00000260211	processed_pseudogene	AC139426.1	processed_pseudogene	AC139426.1-201	2529	8.73155	7.67812	3.47989	3.52592	0.000390473	0.0113555	8.20483	3.50291	0.744889	0.0325444
ENST00000447623.2	chr1	ENSG00000231064	lncRNA	AC234582.1	lncRNA	AC234582.1-201	923	10.1374	8.85805	3.6909	3.62285	0.000389097	0.0113555	9.49773	3.65688	0.904633	0.0481191
ENST00000622301.1	chr1	ENSG00000275075	processed_pseudogene	AC244015.1	processed_pseudogene	AC244015.1-201	99	7.56107	6.88214	2.8676	2.81473	0.000430484	0.0113555	7.2216	2.84116	0.480072	0.0373855
ENST00000649408.1	chr1	ENSG00000160710	protein_coding	ADAR	nonsense_mediated_decay	ADAR-219	1797	3.95725	4.17065	17.062	16.4372	3.12494e-05	0.0113555	4.06395	16.7496	0.150893	0.44174
ENST00000631642.1	chr21	ENSG00000197381	protein_coding	ADARB1	lncRNA	ADARB1-215	301	54.711	53.1937	18.8633	17.5897	2.55958e-05	0.0113555	53.9523	18.2265	1.07287	0.900545
ENST00000539149.1	chr4	ENSG00000087274	protein_coding	ADD1	retained_intron	ADD1-225	460	4.06818	3.70289	15.4289	13.9329	0.000324531	0.0113555	3.88554	14.6809	0.2583	1.05785
ENST00000264436.9	chr2	ENSG00000075340	protein_coding	ADD2	protein_coding	ADD2-201	9290	29.692	32.0864	11.8874	12.1782	0.000409171	0.0113555	30.8892	12.0328	1.69308	0.205591
ENST00000468215.1	chr1	ENSG00000035687	protein_coding	ADSS	lncRNA	ADSS-203	807	4.63783	4.64353	10.9054	12.4308	0.00141121	0.0113555	4.64068	11.6681	0.00402919	1.07865
ENST00000473633.1	chr7	ENSG00000133612	protein_coding	AGAP3	retained_intron	AGAP3-212	3751	13.0711	12.8056	3.78422	3.41729	4.0977e-05	0.0113555	12.9384	3.60076	0.187725	0.259457
ENST00000555570.1	chr14	ENSG00000140057	protein_coding	AK7	protein_coding	AK7-204	1345	8.34809	8.35835	1.47751	1.45026	4.80458e-06	0.0113555	8.35322	1.46388	0.00725254	0.0192626
ENST00000394718.4	chr14	ENSG00000179841	protein_coding	AKAP5	protein_coding	AKAP5-202	6487	8.48128	8.665	20.4812	18.729	0.000532564	0.0113555	8.57314	19.6051	0.12991	1.23901
ENST00000420494.2	chr6	ENSG00000135334	protein_coding	AKIRIN2	lncRNA	AKIRIN2-202	413	15.4059	15.6723	35.0569	33.7358	7.66e-05	0.0113555	15.5391	34.3964	0.188363	0.934141
ENST00000537834.5	chr19	ENSG00000105221	protein_coding	AKT2	retained_intron	AKT2-228	1402	2.40261	2.18687	7.08718	7.35402	7.97567e-05	0.0113555	2.29474	7.2206	0.152548	0.188688
ENST00000606125.1	chr6	ENSG00000272316	lncRNA	AL021368.2	lncRNA	AL021368.2-201	5352	6.29382	6.49251	14.6402	14.6826	4.02804e-05	0.0113555	6.39317	14.6614	0.140494	0.0300306
ENST00000609212.1	chr22	ENSG00000272669	lncRNA	AL021707.6	lncRNA	AL021707.6-201	491	40.4001	37.4663	10.4074	9.0805	0.000117118	0.0113555	38.9332	9.74397	2.0745	0.938295
ENST00000453679.1	chr22	ENSG00000232218	unprocessed_pseudogene	AL021937.2	unprocessed_pseudogene	AL021937.2-201	201	3.72411	3.38971	11.2992	12.4772	0.000618658	0.0113555	3.55691	11.8882	0.236453	0.832993
ENST00000566714.1	chr1	ENSG00000261349	unprocessed_pseudogene	AL031432.2	unprocessed_pseudogene	AL031432.2-201	459	15.4928	15.586	34.0176	33.3904	2.3121e-05	0.0113555	15.5394	33.704	0.0659405	0.443495
ENST00000433132.1	chr1	ENSG00000235912	processed_pseudogene	AL031729.1	processed_pseudogene	AL031729.1-201	192	15.5947	17.743	7.39302	7.25671	0.00143745	0.0113555	16.6689	7.32487	1.51909	0.0963845
ENST00000604801.1	chr1	ENSG00000270728	processed_pseudogene	AL035413.1	processed_pseudogene	AL035413.1-201	525	17.1096	19.4666	8.65195	7.96165	0.00188892	0.0113555	18.2881	8.3068	1.66666	0.488113
ENST00000424664.1	chr1	ENSG00000225767	lncRNA	AL049637.1	lncRNA	AL049637.1-201	503	0.744081	0.677268	3.95078	3.87794	4.40459e-05	0.0113555	0.710675	3.91436	0.0472437	0.0515073
ENST00000665497.1	chr22	ENSG00000287817	lncRNA	AL096701.4	lncRNA	AL096701.4-201	873	8.14568	7.80449	3.25191	2.87276	0.000214131	0.0113555	7.97509	3.06234	0.241261	0.268101
ENST00000412228.1	chr1	ENSG00000231050	lncRNA	AL109917.1	lncRNA	AL109917.1-201	906	3.30484	3.3841	0.626693	0.615139	2.72506e-05	0.0113555	3.34447	0.620916	0.0560471	0.00817034
ENST00000556537.1	chr14	ENSG00000259083	lncRNA	AL132639.3	lncRNA	AL132639.3-201	530	0.706175	0.642766	2.67823	2.62885	0.000103279	0.0113555	0.67447	2.65354	0.0448369	0.0349166
ENST00000610331.1	chr2	ENSG00000276334	lncRNA	AL133243.2	lncRNA	AL133243.2-201	1621	4.38691	4.62347	16.1123	15.6433	3.51162e-05	0.0113555	4.50519	15.8778	0.167276	0.331615
ENST00000618431.1	chr14	ENSG00000273783	lncRNA	AL136040.1	lncRNA	AL136040.1-201	1130	2.3185	2.11032	0.251232	0.2466	4.82778e-05	0.0113555	2.21441	0.248916	0.147208	0.00327537
ENST00000607711.1	chr6	ENSG00000271888	lncRNA	AL136162.1	lncRNA	AL136162.1-201	1078	15.9708	15.1688	3.68691	3.61893	4.42331e-06	0.0113555	15.5698	3.65292	0.567115	0.0480671
ENST00000618151.1	chr13	ENSG00000274270	lncRNA	AL137060.3	lncRNA	AL137060.3-201	2648	4.94696	4.37411	1.71536	1.8942	0.000544844	0.0113555	4.66053	1.80478	0.405065	0.126459
ENST00000433374.1	chr10	ENSG00000230928	lncRNA	AL139241.1	lncRNA	AL139241.1-201	1168	19.5468	20.7083	6.07646	6.44158	0.000155016	0.0113555	20.1275	6.25902	0.821314	0.258179
ENST00000648160.1	chr9	ENSG00000285820	lncRNA	AL157829.1	lncRNA	AL157829.1-201	2075	6.31303	7.22376	1.09452	1.20864	0.000450704	0.0113555	6.7684	1.15158	0.643981	0.0806899
ENST00000503142.1	chr1	ENSG00000251520	unprocessed_pseudogene	AL162431.2	unprocessed_pseudogene	AL162431.2-201	537	1.39394	1.26877	5.28663	5.70807	0.000250613	0.0113555	1.33136	5.49735	0.0885049	0.298006
ENST00000412769.1	chr1	ENSG00000235105	processed_pseudogene	AL356968.2	processed_pseudogene	AL356968.2-201	1257	12.5055	13.5508	4.51698	4.87707	0.000431284	0.0113555	13.0281	4.69702	0.739084	0.254621
ENST00000566446.1	chr1	ENSG00000259865	lncRNA	AL390728.6	lncRNA	AL390728.6-201	1246	58.574	58.5092	25.0627	28.1789	0.000433559	0.0113555	58.5416	26.6208	0.0457771	2.20347
ENST00000669568.1	chr6	ENSG00000287404	lncRNA	AL451080.1	lncRNA	AL451080.1-201	500	11.9767	12.264	1.13557	1.11463	1.551e-05	0.0113555	12.1204	1.1251	0.203115	0.0148047
ENST00000602865.1	chr1	ENSG00000269896	transcribed_processed_pseudogene	AL513477.1	lncRNA	AL513477.1-201	2407	7.93017	6.93504	2.71272	2.6627	0.000304953	0.0113555	7.4326	2.68771	0.703663	0.0353663
ENST00000424332.1	chr1	ENSG00000242861	lncRNA	AL591895.1	lncRNA	AL591895.1-201	348	1.0755	0.978925	3.26313	3.20296	0.000208241	0.0113555	1.02721	3.23305	0.0682861	0.0425421
ENST00000653192.1	chr1	ENSG00000287064	lncRNA	AL606500.1	lncRNA	AL606500.1-201	1224	20.1814	18.6476	6.49426	6.60219	3.82462e-05	0.0113555	19.4145	6.54823	1.08457	0.0763139
ENST00000600073.1	chr4	ENSG00000248840	transcribed_processed_pseudogene	AL645949.1	lncRNA	AL645949.1-202	242	4.63974	4.22313	1.17311	1.15148	0.000157119	0.0113555	4.43144	1.16229	0.29459	0.0152941
ENST00000427886.6	X	ENSG00000223511	lncRNA	AL683807.1	lncRNA	AL683807.1-201	445	0.841062	0.765542	18.5008	16.2811	0.000266564	0.0113555	0.803302	17.391	0.0534013	1.56956
ENST00000293350.9	chr19	ENSG00000161618	protein_coding	ALDH16A1	protein_coding	ALDH16A1-201	3099	5.79706	6.37581	2.3818	2.4278	0.000531264	0.0113555	6.08643	2.4048	0.409236	0.03253
ENST00000635858.1	chr5	ENSG00000164904	protein_coding	ALDH7A1	retained_intron	ALDH7A1-217	887	0.421953	0.384065	1.92035	1.88495	6.34134e-05	0.0113555	0.403009	1.90265	0.0267909	0.0250361
ENST00000638010.1	chr5	ENSG00000164904	protein_coding	ALDH7A1	retained_intron	ALDH7A1-237	1755	1.91935	2.13523	9.38219	9.05043	7.32137e-05	0.0113555	2.02729	9.21631	0.152651	0.234592
ENST00000496689.1	chr13	ENSG00000120697	protein_coding	ALG5	lncRNA	ALG5-205	756	16.3373	17.1234	5.63278	6.26612	0.000305623	0.0113555	16.7304	5.94945	0.555871	0.447836
ENST00000441587.3	chr2	ENSG00000230002	lncRNA	ALMS1-IT1	lncRNA	ALMS1-IT1-201	2105	7.46767	8.4155	17.3977	18.1359	0.00085142	0.0113555	7.94159	17.7668	0.670215	0.522032
ENST00000592877.1	chr19	ENSG00000104899	protein_coding	AMH	lncRNA	AMH-203	534	29.4372	31.2596	15.4174	13.5676	0.00109507	0.0113555	30.3484	14.4925	1.28865	1.30797
ENST00000486054.1	chr15	ENSG00000140350	protein_coding	ANP32A	retained_intron	ANP32A-207	2015	6.50102	6.25541	18.5974	16.8716	0.000308743	0.0113555	6.37821	17.7345	0.173673	1.22033
ENST00000565617.1	chr8	ENSG00000261087	lncRNA	AP003469.4	lncRNA	AP003469.4-201	2825	7.28673	7.59715	21.8069	21.7994	2.67536e-05	0.0113555	7.44194	21.8032	0.219505	0.0053059
ENST00000355285.10	chr18	ENSG00000154856	protein_coding	APCDD1	protein_coding	APCDD1-201	3803	9.15261	10.1223	2.53808	2.71111	0.000349167	0.0113555	9.63747	2.6246	0.685704	0.122346
ENST00000374987.4	X	ENSG00000169188	protein_coding	APEX2	protein_coding	APEX2-201	3239	25.9992	28.7131	10.0795	10.2378	0.000530628	0.0113555	27.3562	10.1587	1.91904	0.111926
ENST00000244669.2	chr6	ENSG00000124701	protein_coding	APOBEC2	protein_coding	APOBEC2-201	1151	32.5172	34.9249	3.45307	3.38941	6.4376e-05	0.0113555	33.7211	3.42124	1.70253	0.0450185
ENST00000518618.2	chr20	ENSG00000101199	protein_coding	ARFGAP1	lncRNA	ARFGAP1-207	1244	2.4069	2.46463	7.5309	6.72004	0.000572665	0.0113555	2.43576	7.12547	0.0408189	0.573361
ENST00000400198.8	chr13	ENSG00000134884	protein_coding	ARGLU1	protein_coding	ARGLU1-203	3363	32.6084	34.0362	5.99356	6.54593	6.78928e-05	0.0113555	33.3223	6.26975	1.00964	0.390587
ENST00000544132.2	chr13	ENSG00000102606	protein_coding	ARHGEF7	protein_coding	ARHGEF7-219	766	10.7493	10.2289	41.509	37.1059	0.000288943	0.0113555	10.4891	39.3074	0.36803	3.1135
ENST00000572991.5	chr17	ENSG00000228696	protein_coding	ARL17B	nonsense_mediated_decay	ARL17B-205	2197	54.0029	54.2709	21.321	19.7864	5.93351e-05	0.0113555	54.1369	20.5537	0.189453	1.08514
ENST00000265138.4	chr5	ENSG00000113369	protein_coding	ARRDC3	protein_coding	ARRDC3-201	4239	12.7141	12.778	55.1175	61.3323	0.000434267	0.0113555	12.7461	58.2249	0.0451415	4.39454
ENST00000467160.1	chr19	ENSG00000105726	protein_coding	ATP13A1	retained_intron	ATP13A1-204	2431	4.15688	3.92375	1.51814	1.37552	0.000109659	0.0113555	4.04031	1.44683	0.164841	0.100846
ENST00000588390.1	chr18	ENSG00000152234	protein_coding	ATP5F1A	retained_intron	ATP5F1A-207	556	166.942	169.108	828.189	808.408	5.20085e-06	0.0113555	168.025	818.299	1.53143	13.9868
ENST00000589611.1	chr18	ENSG00000152234	protein_coding	ATP5F1A	retained_intron	ATP5F1A-209	995	208.765	207.481	584.047	577.48	1.16023e-06	0.0113555	208.123	580.764	0.908071	4.64389
ENST00000590324.5	chr18	ENSG00000152234	protein_coding	ATP5F1A	protein_coding	ATP5F1A-212	807	2.31891	2.53283	10.2018	9.66843	0.000102442	0.0113555	2.42587	9.93512	0.151263	0.377168
ENST00000284727.8	chr2	ENSG00000154518	protein_coding	ATP5MC3	protein_coding	ATP5MC3-201	5484	13.4449	15.2194	4.65906	4.57316	0.000659985	0.0113555	14.3321	4.61611	1.25477	0.0607412
ENST00000576409.5	chr1	ENSG00000123472	protein_coding	ATPAF1	protein_coding	ATPAF1-214	4158	16.8324	17.3692	6.69106	7.63997	0.000592939	0.0113555	17.1008	7.16551	0.379604	0.670981
ENST00000561539.1	chr16	ENSG00000168488	protein_coding	ATXN2L	retained_intron	ATXN2L-206	509	0.73531	0.669285	6.13519	5.47461	0.000263986	0.0113555	0.702297	5.8049	0.0466868	0.4671
ENST00000464768.2	chr7	ENSG00000158321	protein_coding	AUTS2	retained_intron	AUTS2-209	964	14.3652	14.8423	5.59538	4.91409	0.000300265	0.0113555	14.6038	5.25474	0.337328	0.481747
ENST00000379198.5	chr1	ENSG00000176022	protein_coding	B3GALT6	protein_coding	B3GALT6-201	2805	24.5512	22.7111	9.8173	8.94089	0.000175152	0.0113555	23.6311	9.3791	1.30119	0.619714
ENST00000646514.1	X	ENSG00000185825	protein_coding	BCAP31	lncRNA	BCAP31-212	1217	2.15276	2.23938	5.36526	5.49531	9.46308e-05	0.0113555	2.19607	5.43028	0.0612508	0.091959
ENST00000372728.4	X	ENSG00000133169	protein_coding	BEX1	protein_coding	BEX1-201	795	368.623	376.232	137.125	150.37	0.000180798	0.0113555	372.428	143.748	5.38039	9.36552
ENST00000592115.5	chr17	ENSG00000089685	protein_coding	BIRC5	retained_intron	BIRC5-210	1141	2.62417	2.38854	0.24881	0.244222	4.33934e-05	0.0113555	2.50636	0.246516	0.166616	0.00324379
ENST00000605448.1	chr19	ENSG00000271524	processed_pseudogene	BNIP3P17	processed_pseudogene	BNIP3P17-201	595	15.7257	17.1764	6.20268	7.02499	0.00102079	0.0113555	16.4511	6.61384	1.02579	0.581456
ENST00000394688.7	chr16	ENSG00000166164	protein_coding	BRD7	protein_coding	BRD7-201	5370	4.6	3.99664	1.05733	0.934049	0.000286953	0.0113555	4.29832	0.995687	0.42664	0.0871704
ENST00000265922.8	chr9	ENSG00000078725	protein_coding	BRINP1	protein_coding	BRINP1-201	3171	15.4619	13.7513	6.35646	6.06351	0.000311234	0.0113555	14.6066	6.20999	1.20961	0.207147
ENST00000381105.2	X	ENSG00000285756	lncRNA	BX890604.2	lncRNA	BX890604.2-218	2118	18.7313	17.3711	7.37208	6.84146	0.000108949	0.0113555	18.0512	7.10677	0.961834	0.375206
ENST00000223642.2	chr9	ENSG00000106804	protein_coding	C5	protein_coding	C5-201	5465	4.72549	5.23622	11.3245	10.7078	0.000697642	0.0113555	4.98086	11.0162	0.361139	0.436081
ENST00000249364.9	chr7	ENSG00000128595	protein_coding	CALU	protein_coding	CALU-201	5266	9.73706	8.86275	3.82764	3.96873	0.00014471	0.0113555	9.29991	3.89818	0.618232	0.0997685
ENST00000526890.5	chr11	ENSG00000110619	protein_coding	CARS	retained_intron	CARS-212	5732	4.1789	3.74424	16.0965	14.0982	0.000598458	0.0113555	3.96157	15.0973	0.307354	1.413
ENST00000264033.5	chr11	ENSG00000110395	protein_coding	CBL	protein_coding	CBL-201	11231	10.1974	9.52445	20.5506	20.9409	4.84437e-05	0.0113555	9.86095	20.7458	0.475875	0.275952
ENST00000306193.8	chr4	ENSG00000145439	protein_coding	CBR4	protein_coding	CBR4-201	3440	43.4113	45.158	18.4035	19.1982	0.000164239	0.0113555	44.2847	18.8008	1.23515	0.56198
ENST00000486098.1	chr21	ENSG00000160200	protein_coding	CBS	retained_intron	CBS-214	773	4.35764	3.96636	11.0178	10.0937	0.000457955	0.0113555	4.162	10.5557	0.276678	0.65345
ENST00000443758.6	chr2	ENSG00000163492	protein_coding	CCDC141	protein_coding	CCDC141-203	9131	30.291	34.5479	10.4155	11.8409	0.00152442	0.0113555	32.4195	11.1282	3.01004	1.00792
ENST00000433419.2	chr17	ENSG00000154898	transcribed_processed_pseudogene	CCDC144CP	transcribed_processed_pseudogene	CCDC144CP-202	5227	1.57528	1.36866	5.53989	5.01126	0.000365343	0.0113555	1.47197	5.27557	0.146104	0.373799
ENST00000513708.1	chr5	ENSG00000230561	protein_coding	CCDC192	lncRNA	CCDC192-202	663	2.82257	2.56913	0.428193	0.420298	6.86483e-05	0.0113555	2.69585	0.424246	0.179212	0.00558245
ENST00000491922.1	chr10	ENSG00000108091	protein_coding	CCDC6	retained_intron	CCDC6-202	2642	0.141663	0.128942	1.3969	1.26567	0.000162261	0.0113555	0.135303	1.33128	0.00899454	0.0927918
ENST00000530106.2	chr11	ENSG00000149231	protein_coding	CCDC82	protein_coding	CCDC82-205	3972	18.6571	17.9253	5.14608	5.89307	0.00015334	0.0113555	18.2912	5.51957	0.517479	0.528199
ENST00000480060.5	chr6	ENSG00000204536	protein_coding	CCHCR1	lncRNA	CCHCR1-213	601	17.437	16.4381	37.7893	36.6289	3.80652e-05	0.0113555	16.9376	37.2091	0.706311	0.820522
ENST00000261254.8	chr12	ENSG00000118971	protein_coding	CCND2	protein_coding	CCND2-201	6493	48.1315	53.8308	136.896	131.926	0.000324675	0.0113555	50.9811	134.411	4.03001	3.5145
ENST00000490278.1	chr1	ENSG00000117335	protein_coding	CD46	retained_intron	CD46-216	747	3.00621	3.19232	12.5414	11.5641	0.000176831	0.0113555	3.09926	12.0528	0.131601	0.691058
ENST00000209728.9	chr17	ENSG00000094804	protein_coding	CDC6	protein_coding	CDC6-201	4564	21.7314	22.094	6.65566	6.89928	2.72307e-05	0.0113555	21.9127	6.77747	0.256389	0.172266
ENST00000289746.3	chr16	ENSG00000129910	protein_coding	CDH15	protein_coding	CDH15-201	2866	6.13776	5.58664	0.891496	0.87506	2.99389e-05	0.0113555	5.8622	0.883278	0.389703	0.0116226
ENST00000623535.2	X	ENSG00000008086	protein_coding	CDKL5	protein_coding	CDKL5-205	14572	4.39203	4.90941	15.5856	14.5907	0.000314048	0.0113555	4.65072	15.0882	0.365841	0.703503
ENST00000458198.3	chr5	ENSG00000237190	protein_coding	CDKN2AIPNL	protein_coding	CDKN2AIPNL-202	1228	106.979	100.147	40.4569	37.6687	6.5449e-05	0.0113555	103.563	39.0628	4.83073	1.97156
ENST00000372927.5	X	ENSG00000102384	protein_coding	CENPI	protein_coding	CENPI-202	3262	12.8506	12.9499	5.39586	6.06521	0.000432467	0.0113555	12.9002	5.73054	0.0702413	0.473297
ENST00000591863.1	chr19	ENSG00000121289	protein_coding	CEP89	protein_coding	CEP89-207	2903	19.3389	16.8983	7.72562	7.48719	0.000448741	0.0113555	18.1186	7.6064	1.72575	0.168596
ENST00000295304.5	chr2	ENSG00000143942	protein_coding	CHAC2	protein_coding	CHAC2-201	1309	101.217	106.182	29.2784	29.3772	7.41634e-05	0.0113555	103.699	29.3278	3.51078	0.0698743
ENST00000395422.4	chr7	ENSG00000106153	protein_coding	CHCHD2	protein_coding	CHCHD2-201	797	394.935	391.958	136.781	153.839	0.000178608	0.0113555	393.447	145.31	2.10506	12.0615
ENST00000378961.9	chr20	ENSG00000089199	protein_coding	CHGB	protein_coding	CHGB-201	2462	145.483	128.684	52.4658	51.8381	0.000297349	0.0113555	137.083	52.1519	11.8788	0.44391
ENST00000476541.1	chr9	ENSG00000148337	protein_coding	CIZ1	retained_intron	CIZ1-217	513	28.4535	31.8752	71.9415	79.8493	0.00136703	0.0113555	30.1643	75.8954	2.4195	5.5917
ENST00000493551.1	chr2	ENSG00000115295	protein_coding	CLIP4	retained_intron	CLIP4-212	627	1.19385	1.08665	7.24445	7.99975	0.000254863	0.0113555	1.14025	7.6221	0.0758009	0.534072
ENST00000581487.1	chr16	ENSG00000183723	protein_coding	CMTM4	retained_intron	CMTM4-205	7026	7.08487	7.5154	16.6472	15.5868	0.000429973	0.0113555	7.30014	16.117	0.304436	0.74988
ENST00000585869.1	chr19	ENSG00000130176	protein_coding	CNN1	protein_coding	CNN1-203	549	0.681735	0.620521	2.58554	2.53787	0.000103279	0.0113555	0.651128	2.5617	0.0432852	0.0337082
ENST00000488813.1	chr7	ENSG00000106603	protein_coding	COA1	lncRNA	COA1-218	1641	1.82461	1.66077	8.82297	9.84897	0.00030289	0.0113555	1.74269	9.33597	0.115849	0.725488
ENST00000307149.10	chr16	ENSG00000168434	protein_coding	COG7	protein_coding	COG7-201	2935	4.71826	4.41067	10.6399	10.3488	3.38103e-05	0.0113555	4.56446	10.4943	0.217501	0.20585
ENST00000488111.1	chr2	ENSG00000144524	protein_coding	COPS7B	retained_intron	COPS7B-221	2381	1.10034	1.14461	3.93467	3.51102	0.000483928	0.0113555	1.12248	3.72284	0.0313071	0.299564
ENST00000461102.1	chr9	ENSG00000167113	protein_coding	COQ4	lncRNA	COQ4-203	3127	21.664	19.0651	4.90252	5.07947	0.000143687	0.0113555	20.3646	4.99099	1.83771	0.125123
ENST00000261643.8	chr17	ENSG00000006695	protein_coding	COX10	protein_coding	COX10-201	2898	8.39466	9.40417	19.8862	19.231	0.000662638	0.0113555	8.89941	19.5586	0.713829	0.463236
ENST00000489629.1	chr2	ENSG00000119203	protein_coding	CPSF3	retained_intron	CPSF3-205	547	0.684228	0.62279	3.63299	3.56601	4.40459e-05	0.0113555	0.653509	3.5995	0.0434434	0.0473641
ENST00000354336.8	chr22	ENSG00000099942	protein_coding	CRKL	protein_coding	CRKL-201	5342	64.6675	71.934	142.584	136.303	0.000855322	0.0113555	68.3007	139.444	5.13817	4.44086
ENST00000570385.1	chr17	ENSG00000175826	protein_coding	CTDNEP1	retained_intron	CTDNEP1-203	529	2.83004	2.57592	6.4399	6.84792	0.000417471	0.0113555	2.70298	6.64391	0.179687	0.28852
ENST00000527862.1	chr17	ENSG00000161692	protein_coding	DBF4B	retained_intron	DBF4B-206	1998	8.42957	8.01366	1.98923	2.23149	7.33435e-05	0.0113555	8.22162	2.11036	0.294087	0.171304
ENST00000522625.1	chr5	ENSG00000132912	protein_coding	DCTN4	retained_intron	DCTN4-214	598	9.38811	8.54513	33.2315	30.2889	0.000228935	0.0113555	8.96662	31.7602	0.596076	2.08075
ENST00000421952.3	chr12	ENSG00000181418	protein_coding	DDN	protein_coding	DDN-201	3815	16.0893	14.466	6.25083	5.77037	0.000266913	0.0113555	15.2777	6.0106	1.14784	0.339738
ENST00000478695.1	chr2	ENSG00000079785	protein_coding	DDX1	retained_intron	DDX1-206	554	116.876	118.065	278.768	278.155	8.86878e-06	0.0113555	117.47	278.461	0.840722	0.433331
ENST00000475700.1	chr1	ENSG00000064703	protein_coding	DDX20	protein_coding	DDX20-202	4332	0.950369	0.865034	3.08008	3.40925	0.000397899	0.0113555	0.907702	3.24467	0.0603415	0.232754
ENST00000622373.1	X	ENSG00000215301	protein_coding	DDX3X	retained_intron	DDX3X-214	2129	1.23058	1.2801	5.33381	5.8899	0.000282034	0.0113555	1.25534	5.61186	0.0350128	0.393216
ENST00000452510.7	chr5	ENSG00000145833	protein_coding	DDX46	protein_coding	DDX46-202	5674	12.5329	12.068	5.50372	5.40225	2.62537e-06	0.0113555	12.3005	5.45299	0.328748	0.0717533
ENST00000513987.1	chr5	ENSG00000145833	protein_coding	DDX46	retained_intron	DDX46-211	543	9.64976	9.41066	51.7593	56.9632	0.000162153	0.0113555	9.53021	54.3613	0.169066	3.6797
ENST00000263256.7	chr22	ENSG00000100418	protein_coding	DESI1	protein_coding	DESI1-201	3780	57.5271	55.5159	24.0332	24.9907	1.74329e-05	0.0113555	56.5215	24.512	1.42211	0.677091
ENST00000439211.7	chr5	ENSG00000228716	protein_coding	DHFR	protein_coding	DHFR-201	3919	201.796	197.15	61.7913	66.2692	2.28125e-05	0.0113555	199.473	64.0302	3.28525	3.1664
ENST00000579682.1	chr18	ENSG00000188985	processed_pseudogene	DHFRP1	processed_pseudogene	DHFRP1-201	559	149.977	169.419	54.3407	56.8283	0.000802171	0.0113555	159.698	55.5845	13.7475	1.75896
ENST00000510645.5	chr4	ENSG00000109606	protein_coding	DHX15	lncRNA	DHX15-206	470	11.9449	12.322	3.02013	2.96445	3.7114e-05	0.0113555	12.1334	2.99229	0.26664	0.0393741
ENST00000514254.3	chr12	ENSG00000250091	lncRNA	DNAH10OS	lncRNA	DNAH10OS-201	6003	5.05016	4.71019	12.0121	11.4657	7.34471e-05	0.0113555	4.88017	11.7389	0.240392	0.38637
ENST00000590197.1	chr17	ENSG00000168259	protein_coding	DNAJC7	retained_intron	DNAJC7-217	1762	3.82344	3.48013	19.0121	20.4012	9.17033e-05	0.0113555	3.65179	19.7066	0.242761	0.982243
ENST00000393987.2	chr6	ENSG00000112667	protein_coding	DNPH1	protein_coding	DNPH1-202	796	14.5759	15.835	3.20984	3.50073	0.00021305	0.0113555	15.2055	3.35528	0.890267	0.205691
ENST00000564075.1	chr16	ENSG00000149927	protein_coding	DOC2A	lncRNA	DOC2A-205	292	1.28176	1.16666	5.8334	6.68015	0.000774565	0.0113555	1.22421	6.25678	0.0813821	0.598746
ENST00000630992.2	chr13	ENSG00000088387	protein_coding	DOCK9	nonsense_mediated_decay	DOCK9-217	11831	0.601063	0.547093	2.51954	2.59085	2.40716e-05	0.0113555	0.574078	2.5552	0.0381631	0.0504253
ENST00000521525.1	chr8	ENSG00000156162	protein_coding	DPY19L4	protein_coding	DPY19L4-205	802	1.8667	1.69908	0.35398	0.347454	9.37665e-05	0.0113555	1.78289	0.350717	0.118522	0.00461492
ENST00000298573.9	chr12	ENSG00000111266	protein_coding	DUSP16	protein_coding	DUSP16-202	6661	5.28174	5.88149	14.6187	14.8512	0.00027316	0.0113555	5.58161	14.7349	0.424089	0.164388
ENST00000240100.7	chr8	ENSG00000120875	protein_coding	DUSP4	protein_coding	DUSP4-201	5553	4.31361	3.86493	9.86695	9.58467	0.000120363	0.0113555	4.08927	9.72581	0.317262	0.199605
ENST00000361729.3	chr1	ENSG00000007968	protein_coding	E2F2	protein_coding	E2F2-201	5196	62.0186	55.9253	27.7008	25.4203	0.000427967	0.0113555	58.972	26.5605	4.30861	1.61256
ENST00000322886.12	chr12	ENSG00000165891	protein_coding	E2F7	protein_coding	E2F7-201	5725	7.58352	7.08109	2.82652	3.21247	0.000439393	0.0113555	7.3323	3.0195	0.355268	0.272909
ENST00000514975.1	chr4	ENSG00000249264	processed_pseudogene	EEF1A1P9	processed_pseudogene	EEF1A1P9-201	1383	10.5543	9.60663	4.31073	4.02976	0.000199117	0.0113555	10.0805	4.17024	0.670122	0.198673
ENST00000530028.3	chr15	ENSG00000255302	protein_coding	EID1	protein_coding	EID1-201	2040	269.88	260.676	101.867	111.6	0.000106169	0.0113555	265.278	106.733	6.50802	6.88197
ENST00000475415.5	chr7	ENSG00000106263	protein_coding	EIF3B	retained_intron	EIF3B-211	3745	3.298	3.36573	20.7707	19.3461	5.0574e-05	0.0113555	3.33186	20.0584	0.0478908	1.00739
ENST00000531120.6	chr11	ENSG00000149100	protein_coding	EIF3M	protein_coding	EIF3M-208	5047	10.5304	10.7998	3.82498	3.47839	0.000120821	0.0113555	10.6651	3.65168	0.190518	0.245073
ENST00000470023.1	chr2	ENSG00000158417	protein_coding	EIF5B	retained_intron	EIF5B-202	2331	3.53239	3.79979	10.5957	9.32446	0.00103843	0.0113555	3.66609	9.96009	0.189082	0.898914
ENST00000354666.4	chr6	ENSG00000197977	protein_coding	ELOVL2	protein_coding	ELOVL2-201	3988	211.443	227.566	96.3154	105.3	0.00101324	0.0113555	219.505	100.808	11.4005	6.35321
ENST00000369016.8	chr1	ENSG00000143420	protein_coding	ENSA	protein_coding	ENSA-209	923	1.62198	1.47634	4.61363	4.22666	0.000415052	0.0113555	1.54916	4.42015	0.102984	0.273628
ENST00000475841.2	chr12	ENSG00000185684	transcribed_unprocessed_pseudogene	EP400P1	lncRNA	EP400P1-208	7090	24.0717	21.622	7.68791	7.9785	0.000152895	0.0113555	22.8468	7.8332	1.73223	0.205476
ENST00000495030.1	chr2	ENSG00000115109	protein_coding	EPB41L5	lncRNA	EPB41L5-210	444	2.52887	2.3018	0.639397	0.627608	0.000157119	0.0113555	2.41533	0.633502	0.160565	0.00833595
ENST00000586655.1	chr18	ENSG00000152223	protein_coding	EPG5	lncRNA	EPG5-203	537	2.78788	3.17194	9.51594	10.3783	0.000613371	0.0113555	2.97991	9.94713	0.27157	0.609797
ENST00000270460.10	chr19	ENSG00000063245	protein_coding	EPN1	protein_coding	EPN1-202	16219	3.23067	3.25564	0.927695	0.944952	1.01928e-05	0.0113555	3.24315	0.936323	0.0176589	0.012203
ENST00000262109.8	chr8	ENSG00000104714	protein_coding	ERICH1	protein_coding	ERICH1-201	1798	11.4488	11.9366	5.36837	5.11441	0.000187587	0.0113555	11.6927	5.24139	0.344884	0.179578
ENST00000368192.9	chr1	ENSG00000117036	protein_coding	ETV3	protein_coding	ETV3-202	5282	16.7225	14.8985	32.4095	33.0253	0.000233033	0.0113555	15.8105	32.7174	1.28978	0.435467
ENST00000308618.4	chr2	ENSG00000174279	protein_coding	EVX2	protein_coding	EVX2-201	4203	17.6317	17.5885	6.07906	5.63548	3.5492e-05	0.0113555	17.6101	5.85727	0.0305327	0.313659
ENST00000478344.6	chr9	ENSG00000187609	protein_coding	EXD3	nonsense_mediated_decay	EXD3-206	2932	0.255302	0.232378	1.74286	1.71072	1.40889e-05	0.0113555	0.24384	1.72679	0.0162098	0.022722
ENST00000533676.5	chr11	ENSG00000221968	protein_coding	FADS3	retained_intron	FADS3-211	5314	0.633883	0.576965	2.45748	2.30729	8.317e-05	0.0113555	0.605424	2.38238	0.0402469	0.106198
ENST00000427358.3	chr16	ENSG00000180185	protein_coding	FAHD1	protein_coding	FAHD1-203	1974	44.7459	40.2103	13.9501	15.6692	0.000369626	0.0113555	42.4781	14.8097	3.20712	1.21558
ENST00000478494.1	chr2	ENSG00000170264	protein_coding	FAM161A	retained_intron	FAM161A-206	630	21.387	23.7925	9.91369	10.6155	0.00125601	0.0113555	22.5898	10.2646	1.70097	0.49628
ENST00000371384.4	chr20	ENSG00000124098	protein_coding	FAM210B	protein_coding	FAM210B-201	2987	60.8961	65.4644	32.2194	29.7596	0.000862053	0.0113555	63.1803	30.9895	3.23033	1.73937
ENST00000519824.6	chr8	ENSG00000153310	protein_coding	FAM49B	protein_coding	FAM49B-215	3798	19.906	19.4641	4.70911	4.40218	7.24457e-06	0.0113555	19.685	4.55564	0.312515	0.217034
ENST00000461149.1	chr9	ENSG00000221829	protein_coding	FANCG	retained_intron	FANCG-204	388	27.974	30.7302	13.9019	13.6456	0.000816045	0.0113555	29.3521	13.7738	1.94892	0.181243
ENST00000470617.1	chr2	ENSG00000006607	protein_coding	FARP2	retained_intron	FARP2-211	3273	6.97545	6.34911	2.68886	2.55415	0.000132446	0.0113555	6.66228	2.62151	0.44289	0.0952572
ENST00000274457.5	chr5	ENSG00000145780	protein_coding	FEM1C	protein_coding	FEM1C-201	5697	17.6723	19.1352	40.2143	37.1739	0.000983739	0.0113555	18.4038	38.6941	1.03438	2.14986
ENST00000305885.3	chr11	ENSG00000168496	protein_coding	FEN1	protein_coding	FEN1-201	2016	161.517	157.321	68.5791	77.5432	0.000419354	0.0113555	159.419	73.0611	2.96636	6.33857
ENST00000281092.9	chr5	ENSG00000151422	protein_coding	FER	protein_coding	FER-201	12044	2.85894	3.13965	7.47208	7.21864	0.000290368	0.0113555	2.99929	7.34536	0.19849	0.179216
ENST00000570585.1	chr17	ENSG00000141568	protein_coding	FOXK2	retained_intron	FOXK2-207	756	0.99014	0.901233	6.75934	7.7405	0.000514141	0.0113555	0.945686	7.24992	0.0628666	0.693785
ENST00000617716.4	chr21	ENSG00000275464	protein_coding	FP565260.1	protein_coding	FP565260.1-201	3188	45.3166	39.5378	17.1867	18.618	0.000747226	0.0113555	42.4272	17.9023	4.08624	1.01207
ENST00000654923.1	chr1	ENSG00000287607	processed_pseudogene	FP700111.3	processed_pseudogene	FP700111.3-201	99	7.56107	6.88214	2.8676	2.81473	0.000430484	0.0113555	7.2216	2.84116	0.480072	0.0373855
ENST00000527973.1	chr19	ENSG00000010361	protein_coding	FUZ	lncRNA	FUZ-210	573	10.4509	10.107	4.45904	3.89051	0.000328078	0.0113555	10.279	4.17477	0.243159	0.402009
ENST00000473375.1	chr3	ENSG00000114416	protein_coding	FXR1	retained_intron	FXR1-210	483	2.32468	2.11594	7.64099	6.92318	0.000439654	0.0113555	2.22031	7.28208	0.1476	0.507569
ENST00000499326.1	chr15	ENSG00000244879	lncRNA	GABPB1-AS1	lncRNA	GABPB1-AS1-201	717	2.08799	2.37563	0.395944	0.388644	0.000377192	0.0113555	2.23181	0.392294	0.203393	0.00516201
ENST00000499624.3	chr15	ENSG00000244879	lncRNA	GABPB1-AS1	lncRNA	GABPB1-AS1-202	16182	12.7672	14.1681	35.947	33.0973	0.000888679	0.0113555	13.4676	34.5222	0.990599	2.01507
ENST00000667080.1	chr2	ENSG00000236289	lncRNA	GACAT3	lncRNA	GACAT3-208	2267	21.9578	21.3386	7.38846	6.88348	2.14933e-05	0.0113555	21.6482	7.13597	0.437834	0.357076
ENST00000515868.5	chr4	ENSG00000178950	protein_coding	GAK	retained_intron	GAK-221	3903	0.958936	1.0474	3.27316	3.21281	9.24544e-05	0.0113555	1.00317	3.24299	0.0625516	0.0426729
ENST00000447102.8	chr19	ENSG00000130005	protein_coding	GAMT	protein_coding	GAMT-202	1769	16.2911	16.3689	6.74023	6.931	2.78808e-05	0.0113555	16.33	6.83562	0.0550046	0.134897
ENST00000465247.1	chr7	ENSG00000157259	protein_coding	GATAD1	retained_intron	GATAD1-202	797	0.469602	0.427435	6.76782	6.2934	6.17527e-05	0.0113555	0.448519	6.53061	0.0298163	0.335462
ENST00000559798.2	chr15	ENSG00000138604	protein_coding	GLCE	lncRNA	GLCE-204	1308	66.957	68.7583	31.9053	34.5127	0.000356061	0.0113555	67.8577	33.209	1.27366	1.84369
ENST00000561942.1	chr16	ENSG00000090863	protein_coding	GLG1	retained_intron	GLG1-205	674	0.555301	0.505439	2.52723	2.48063	6.34134e-05	0.0113555	0.53037	2.50393	0.0352575	0.032948
ENST00000471465.1	chr1	ENSG00000174842	protein_coding	GLMN	retained_intron	GLMN-203	769	7.30051	6.64498	18.0894	17.0311	0.000191252	0.0113555	6.97274	17.5602	0.463529	0.748295
ENST00000479552.1	chr2	ENSG00000115419	protein_coding	GLS	retained_intron	GLS-213	2016	1.29956	1.35185	4.3654	4.14669	7.81507e-05	0.0113555	1.3257	4.25605	0.0369753	0.154651
ENST00000259727.5	chr6	ENSG00000137198	protein_coding	GMPR	protein_coding	GMPR-201	1508	16.6288	15.5875	5.27121	5.72838	9.12787e-05	0.0113555	16.1082	5.49979	0.736329	0.323269
ENST00000496455.7	chr3	ENSG00000163655	protein_coding	GMPS	protein_coding	GMPS-203	8631	25.8014	25.3398	8.3875	8.42657	5.23894e-07	0.0113555	25.5706	8.40703	0.326454	0.027627
ENST00000332582.4	X	ENSG00000184194	protein_coding	GPR173	protein_coding	GPR173-201	4485	52.8238	48.3085	25.0661	22.4914	0.000515392	0.0113555	50.5661	23.7788	3.19279	1.82052
ENST00000322241.6	chr3	ENSG00000180929	protein_coding	GPR62	protein_coding	GPR62-201	2119	27.0239	27.1697	9.24424	10.2573	0.00015262	0.0113555	27.0968	9.75079	0.103053	0.71637
ENST00000487399.5	chr9	ENSG00000137106	protein_coding	GRHPR	lncRNA	GRHPR-206	952	5.11087	5.00979	1.78924	2.04895	0.000310318	0.0113555	5.06033	1.9191	0.0714697	0.183649
ENST00000434724.7	chr16	ENSG00000103342	protein_coding	GSPT1	protein_coding	GSPT1-202	7141	48.4285	55.7202	23.4158	23.8036	0.00228906	0.0113555	52.0744	23.6097	5.15599	0.274173
ENST00000521942.5	chr5	ENSG00000145736	protein_coding	GTF2H2	retained_intron	GTF2H2-211	1991	5.2635	4.96199	14.5439	15.9553	0.000345251	0.0113555	5.11274	15.2496	0.213206	0.997977
ENST00000614048.1	chr7	ENSG00000263001	protein_coding	GTF2I	retained_intron	GTF2I-214	2844	20.7929	21.8007	51.0087	52.3218	0.000104678	0.0113555	21.2968	51.6653	0.712605	0.928497
ENST00000618412.4	chr7	ENSG00000277053	transcribed_unprocessed_pseudogene	GTF2IP1	retained_intron	GTF2IP1-205	2990	15.6469	17.3181	39.9728	38.1174	0.000458596	0.0113555	16.4825	39.0451	1.18178	1.31193
ENST00000621948.4	chr7	ENSG00000277053	transcribed_unprocessed_pseudogene	GTF2IP1	retained_intron	GTF2IP1-208	2844	30.5314	30.6647	72.67	74.6615	4.07972e-05	0.0113555	30.5981	73.6657	0.0942848	1.40821
ENST00000470606.5	chr13	ENSG00000122034	protein_coding	GTF3A	lncRNA	GTF3A-206	1919	3.3156	3.37293	9.468	8.56739	0.000414624	0.0113555	3.34427	9.01769	0.0405387	0.636831
ENST00000369387.4	chr2	ENSG00000235655	processed_pseudogene	H3F3AP4	processed_pseudogene	H3F3AP4-201	411	4660.65	4633.39	1568.66	1732.29	9.2314e-05	0.0113555	4647.02	1650.47	19.2778	115.704
ENST00000254810.8	chr17	ENSG00000132475	protein_coding	H3F3B	protein_coding	H3F3B-201	2705	282.123	285.379	136.226	138.144	4.76983e-05	0.0113555	283.751	137.185	2.30221	1.35625
ENST00000440551.1	chr13	ENSG00000236534	processed_pseudogene	H3F3BP1	processed_pseudogene	H3F3BP1-201	403	581.377	541.008	170.476	182.545	6.13758e-05	0.0113555	561.192	176.511	28.5448	8.53404
ENST00000498408.1	chr7	ENSG00000105856	protein_coding	HBP1	protein_coding	HBP1-214	2332	2.24692	2.04516	7.42599	6.45263	0.000839308	0.0113555	2.14604	6.93931	0.142663	0.688275
ENST00000519065.6	chr6	ENSG00000196591	protein_coding	HDAC2	protein_coding	HDAC2-205	9737	6.95731	6.54252	1.4578	1.60263	4.08341e-05	0.0113555	6.74992	1.53022	0.293302	0.102412
ENST00000523334.1	chr6	ENSG00000196591	protein_coding	HDAC2	retained_intron	HDAC2-215	4810	7.5477	7.43658	17.2932	17.322	1.9623e-06	0.0113555	7.49214	17.3076	0.0785797	0.0203335
ENST00000561359.1	chr15	ENSG00000103657	protein_coding	HERC1	nonsense_mediated_decay	HERC1-213	551	0.679261	0.618269	3.60661	4.04585	0.000446499	0.0113555	0.648765	3.82623	0.0431281	0.310586
ENST00000369163.3	chr6	ENSG00000278828	protein_coding	HIST1H3H	protein_coding	HIST1H3H-201	1237	27.836	27.8151	6.42601	6.98334	3.02699e-05	0.0113555	27.8255	6.70468	0.014764	0.394091
ENST00000403681.6	chr12	ENSG00000149948	protein_coding	HMGA2	protein_coding	HMGA2-204	4473	336.369	379.051	131.823	145.091	0.00219597	0.0113555	357.71	138.457	30.181	9.38229
ENST00000255320.6	chr3	ENSG00000132967	transcribed_processed_pseudogene	HMGB1P5	transcribed_processed_pseudogene	HMGB1P5-201	642	195.298	198.987	62.3501	63.3708	2.38557e-05	0.0113555	197.143	62.8605	2.60856	0.721714
ENST00000451497.1	chr3	ENSG00000132967	transcribed_processed_pseudogene	HMGB1P5	lncRNA	HMGB1P5-202	985	67.6351	71.9376	18.4458	19.2373	0.000120485	0.0113555	69.7863	18.8415	3.04234	0.559684
ENST00000569046.1	chr15	ENSG00000259781	processed_pseudogene	HMGB1P6	processed_pseudogene	HMGB1P6-201	646	1110.65	1025.16	330.036	354.146	9.79945e-05	0.0113555	1067.91	342.091	60.4502	17.0484
ENST00000325307.12	X	ENSG00000029993	protein_coding	HMGB3	protein_coding	HMGB3-201	3507	139.805	144.057	61.8459	66.8239	0.000286347	0.0113555	141.931	64.3349	3.00634	3.51995
ENST00000506772.2	chr5	ENSG00000249014	processed_pseudogene	HMGN2P4	processed_pseudogene	HMGN2P4-201	381	43.2231	37.5537	14.1573	13.1649	0.000400863	0.0113555	40.3884	13.6611	4.00885	0.70174
ENST00000357495.4	chr13	ENSG00000139675	protein_coding	HNRNPA1L2	protein_coding	HNRNPA1L2-201	1372	543.678	563.887	200.918	202.494	0.000102655	0.0113555	553.782	201.706	14.29	1.1146
ENST00000444945.1	chr19	ENSG00000214223	processed_pseudogene	HNRNPA1P10	processed_pseudogene	HNRNPA1P10-201	962	653.616	600.592	252.906	265.333	0.000139258	0.0113555	627.104	259.12	37.4933	8.78744
ENST00000562726.1	chr16	ENSG00000224578	protein_coding	HNRNPA1P48	lncRNA	HNRNPA1P48-201	1377	138.348	132.852	48.4493	47.1513	2.43051e-06	0.0113555	135.6	47.8003	3.88585	0.917832
ENST00000521273.1	chr18	ENSG00000215492	processed_pseudogene	HNRNPA1P7	processed_pseudogene	HNRNPA1P7-201	963	918.775	852.196	339.02	369.518	0.000189378	0.0113555	885.486	354.269	47.0791	21.5658
ENST00000336053.10	chr14	ENSG00000092199	protein_coding	HNRNPC	protein_coding	HNRNPC-201	3301	51.0217	54.49	18.7484	21.3573	0.000684553	0.0113555	52.7559	20.0528	2.45247	1.84477
ENST00000313899.12	chr4	ENSG00000138668	protein_coding	HNRNPD	protein_coding	HNRNPD-201	3068	25.4964	24.3174	5.552	5.90377	1.217e-05	0.0113555	24.9069	5.72788	0.833674	0.24874
ENST00000514325.1	chr4	ENSG00000138668	protein_coding	HNRNPD	retained_intron	HNRNPD-210	4597	24.0179	24.8256	51.0722	54.1313	0.000410266	0.0113555	24.4217	52.6017	0.571076	2.16311
ENST00000602219.1	chr19	ENSG00000099783	protein_coding	HNRNPM	lncRNA	HNRNPM-216	1809	14.6895	14.6887	35.7808	33.2726	0.000210621	0.0113555	14.6891	34.5267	0.000554265	1.77355
ENST00000373467.4	chr1	ENSG00000121905	protein_coding	HPCA	protein_coding	HPCA-201	1412	156.919	140.175	68.1582	66.3095	0.000313811	0.0113555	148.547	67.2339	11.8398	1.30724
ENST00000298556.8	X	ENSG00000165704	protein_coding	HPRT1	protein_coding	HPRT1-201	1395	125.026	115.021	51.8943	57.3296	0.000433391	0.0113555	120.023	54.6119	7.07483	3.84338
ENST00000257572.5	chr12	ENSG00000135116	protein_coding	HRK	protein_coding	HRK-201	5789	4.13775	3.88391	9.85702	8.71257	0.00108556	0.0113555	4.01083	9.2848	0.179495	0.80925
ENST00000527983.5	chr11	ENSG00000109971	protein_coding	HSPA8	retained_intron	HSPA8-211	1509	0.992108	0.903024	3.38639	2.95462	0.000904561	0.0113555	0.947566	3.1705	0.0629916	0.305303
ENST00000649692.1	chr5	ENSG00000113013	protein_coding	HSPA9	retained_intron	HSPA9-215	2725	10.5758	9.62616	28.1288	25.1559	0.000684609	0.0113555	10.101	26.6423	0.671484	2.10213
ENST00000281938.6	chr12	ENSG00000152137	protein_coding	HSPB8	protein_coding	HSPB8-201	2152	9.56552	10.6062	3.56184	3.49617	0.000477179	0.0113555	10.0859	3.52901	0.735897	0.0464365
ENST00000482167.1	chr2	ENSG00000144381	protein_coding	HSPD1	retained_intron	HSPD1-212	491	22.1057	19.427	75.7431	71.5089	0.000118793	0.0113555	20.7664	73.626	1.89416	2.99401
ENST00000270112.7	chr21	ENSG00000142149	protein_coding	HUNK	protein_coding	HUNK-201	7680	18.5674	18.4527	7.50392	8.63549	0.000555275	0.0113555	18.5101	8.0697	0.0811024	0.800142
ENST00000498605.1	chr15	ENSG00000242028	protein_coding	HYPK	lncRNA	HYPK-205	933	0.8023	0.730259	2.73851	2.98669	0.000379926	0.0113555	0.766279	2.8626	0.0509401	0.175488
ENST00000472894.1	chr9	ENSG00000196305	protein_coding	IARS	lncRNA	IARS-208	651	26.4463	25.6415	57.1273	52.2216	0.00050863	0.0113555	26.0439	54.6744	0.569067	3.46885
ENST00000256433.6	chr18	ENSG00000134049	protein_coding	IER3IP1	protein_coding	IER3IP1-201	3679	48.5263	49.91	22.9182	24.9951	0.000422966	0.0113555	49.2181	23.9567	0.978469	1.46863
ENST00000489492.1	chr2	ENSG00000138002	protein_coding	IFT172	retained_intron	IFT172-214	653	2.86579	2.60847	9.99926	11.0951	0.000432598	0.0113555	2.73713	10.5472	0.181957	0.774879
ENST00000519938.5	chr8	ENSG00000104365	protein_coding	IKBKB	retained_intron	IKBKB-213	2403	2.80354	3.11887	10.3964	9.62489	0.00030379	0.0113555	2.96121	10.0106	0.222973	0.545529
ENST00000403263.6	chr2	ENSG00000114933	protein_coding	INO80D	protein_coding	INO80D-201	14128	6.41096	6.99272	17.4418	17.0808	0.000164976	0.0113555	6.70184	17.2613	0.411368	0.255287
ENST00000569957.5	chr16	ENSG00000169592	protein_coding	INO80E	retained_intron	INO80E-213	4469	7.36988	6.78435	2.85861	3.05532	0.000171841	0.0113555	7.07712	2.95697	0.414031	0.139094
ENST00000593576.1	chr19	ENSG00000269837	transcribed_processed_pseudogene	IPO5P1	lncRNA	IPO5P1-201	2887	31.8916	27.966	9.53846	9.36259	0.000221522	0.0113555	29.9288	9.45053	2.77583	0.124355
ENST00000361124.5	chr2	ENSG00000198885	protein_coding	ITPRIPL1	protein_coding	ITPRIPL1-201	4295	20.0425	17.6083	6.41153	6.55284	0.000254844	0.0113555	18.8254	6.48219	1.72124	0.0999186
ENST00000409785.9	chr2	ENSG00000176407	protein_coding	KCMF1	protein_coding	KCMF1-201	7500	20.9593	23.0744	43.8329	48.7837	0.00280844	0.0113555	22.0169	46.3083	1.49565	3.50072
ENST00000597704.1	chr19	ENSG00000088247	protein_coding	KHSRP	retained_intron	KHSRP-209	706	5.30131	5.30783	21.7141	24.8661	0.000579981	0.0113555	5.30457	23.2901	0.00460561	2.22876
ENST00000565736.1	chr16	ENSG00000079616	protein_coding	KIF22	retained_intron	KIF22-206	1568	36.0428	37.5862	16.6569	18.127	0.000478422	0.0113555	36.8145	17.392	1.09134	1.03948
ENST00000535410.1	chr12	ENSG00000184445	protein_coding	KNTC1	lncRNA	KNTC1-208	331	1.13073	1.0292	3.43072	3.36747	0.000208241	0.0113555	1.07997	3.39909	0.0717933	0.0447271
ENST00000375710.7	chr11	ENSG00000134333	protein_coding	LDHA	retained_intron	LDHA-202	2169	5.17666	5.34008	1.83241	1.92709	9.14984e-05	0.0113555	5.25837	1.87975	0.115556	0.0669546
ENST00000457941.6	chr1	ENSG00000231605	lncRNA	LINC01363	lncRNA	LINC01363-204	1764	38.1911	37.0793	10.2999	11.2158	3.61123e-05	0.0113555	37.6352	10.7579	0.786165	0.647626
ENST00000656070.1	chr17	ENSG00000236819	lncRNA	LINC01563	lncRNA	LINC01563-202	917	9.38743	8.91601	3.71505	4.25432	0.00055011	0.0113555	9.15172	3.98469	0.333342	0.381317
ENST00000554133.5	chr15	ENSG00000272888	lncRNA	LINC01578	retained_intron	LINC01578-202	1776	3.37183	3.83633	10.8697	10.8262	0.000258986	0.0113555	3.60408	10.848	0.328453	0.0307648
ENST00000587918.1	chr18	ENSG00000074695	protein_coding	LMAN1	retained_intron	LMAN1-203	678	7.72835	8.03932	22.6109	23.838	0.000134196	0.0113555	7.88383	23.2244	0.219889	0.8677
ENST00000549587.1	chr12	ENSG00000139636	protein_coding	LMBR1L	retained_intron	LMBR1L-212	545	4.80717	5.0006	11.9808	12.2712	9.46308e-05	0.0113555	4.90389	12.126	0.136775	0.205347
ENST00000549730.5	chr12	ENSG00000139636	protein_coding	LMBR1L	retained_intron	LMBR1L-213	585	2.55913	2.91168	6.794	7.14507	0.000697335	0.0113555	2.7354	6.96954	0.249287	0.248247
ENST00000260702.4	chr10	ENSG00000138131	protein_coding	LOXL4	protein_coding	LOXL4-201	3597	202.692	181.461	66.5335	69.0253	0.000239365	0.0113555	192.077	67.7794	15.0125	1.76199
ENST00000378075.4	chr11	ENSG00000204950	protein_coding	LRRC10B	protein_coding	LRRC10B-201	2270	2.80292	2.55124	0.250125	0.245514	3.45803e-05	0.0113555	2.67708	0.247819	0.177965	0.00326094
ENST00000295628.4	chr3	ENSG00000163428	protein_coding	LRRC58	protein_coding	LRRC58-201	7918	15.0314	16.1341	35.1369	35.7209	0.000192227	0.0113555	15.5828	35.4289	0.779712	0.412893
ENST00000225972.8	chr17	ENSG00000108829	protein_coding	LRRC59	protein_coding	LRRC59-201	2880	185.057	173.172	78.2675	79.9206	4.21796e-05	0.0113555	179.114	79.094	8.40411	1.16895
ENST00000296581.11	chr4	ENSG00000164167	protein_coding	LSM6	protein_coding	LSM6-201	2226	4.70783	4.13207	1.14781	1.12665	0.000173283	0.0113555	4.41995	1.13723	0.407128	0.0149643
ENST00000609777.5	chr2	ENSG00000143429	transcribed_unprocessed_pseudogene	LSP1P4	lncRNA	LSP1P4-206	1194	2.50769	2.56783	6.1819	6.30131	5.47588e-05	0.0113555	2.53776	6.24161	0.0425282	0.084431
ENST00000527339.1	chr11	ENSG00000168056	protein_coding	LTBP3	protein_coding	LTBP3-208	619	16.3253	14.8594	5.50356	4.95192	0.000207792	0.0113555	15.5924	5.22774	1.03654	0.390072
ENST00000464711.5	chr16	ENSG00000007392	protein_coding	LUC7L	retained_intron	LUC7L-213	2134	5.78772	6.06622	19.1567	21.9374	0.000823221	0.0113555	5.92697	20.5471	0.196925	1.96627
ENST00000496532.5	chr1	ENSG00000117643	protein_coding	MAN1C1	lncRNA	MAN1C1-207	769	0.486701	0.442999	3.6917	3.26128	0.000354221	0.0113555	0.46485	3.47649	0.0309019	0.30436
ENST00000399503.4	chr5	ENSG00000095015	protein_coding	MAP3K1	protein_coding	MAP3K1-201	7036	7.28757	8.2794	16.3815	16.9508	0.0010294	0.0113555	7.78349	16.6661	0.70133	0.402534
ENST00000550735.7	chr12	ENSG00000089022	protein_coding	MAPKAPK5	protein_coding	MAPKAPK5-206	11083	12.5624	11.7725	4.55949	4.50056	1.68832e-05	0.0113555	12.1675	4.53003	0.558539	0.0416644
ENST00000556463.5	chr14	ENSG00000075413	protein_coding	MARK3	retained_intron	MARK3-210	3584	6.26573	6.74868	17.268	17.6494	0.000137592	0.0113555	6.50721	17.4587	0.341503	0.269675
ENST00000551805.1	chr12	ENSG00000166986	protein_coding	MARS	retained_intron	MARS-224	479	35.9427	38.4049	113.201	109.369	8.37311e-05	0.0113555	37.1738	111.285	1.74107	2.70991
ENST00000262811.10	chr19	ENSG00000099308	protein_coding	MAST3	protein_coding	MAST3-201	5896	29.8987	26.9251	10.8337	12.1464	0.000534386	0.0113555	28.4119	11.4901	2.10262	0.928179
ENST00000306434.8	chr2	ENSG00000168906	protein_coding	MAT2A	protein_coding	MAT2A-201	2817	552.972	596.075	267.868	305.366	0.00215494	0.0113555	574.524	286.617	30.478	26.515
ENST00000589901.2	chr19	ENSG00000071655	protein_coding	MBD3	retained_intron	MBD3-206	740	11.127	11.9693	4.60366	4.51878	0.000308182	0.0113555	11.5482	4.56122	0.595609	0.0600189
ENST00000487121.1	chr2	ENSG00000180398	protein_coding	MCFD2	retained_intron	MCFD2-216	627	2.3877	2.17331	0.452778	0.44443	9.37665e-05	0.0113555	2.28051	0.448604	0.151602	0.00590297
ENST00000216122.9	chr22	ENSG00000100297	protein_coding	MCM5	protein_coding	MCM5-201	3458	8.55048	8.07826	2.13453	2.33692	5.07922e-05	0.0113555	8.31437	2.23572	0.33391	0.143115
ENST00000610722.4	chr20	ENSG00000125885	protein_coding	MCM8	protein_coding	MCM8-205	7486	24.0982	25.484	9.21531	9.90155	0.000301795	0.0113555	24.7911	9.55843	0.979851	0.485247
ENST00000614579.1	chr8	ENSG00000277740	misc_RNA	Metazoa_SRP	misc_RNA	Metazoa_SRP.171-201	289	12.9506	11.7878	27.5051	25.0696	0.000896016	0.0113555	12.3692	26.2873	0.822269	1.72219
ENST00000492256.1	chr1	ENSG00000116691	protein_coding	MIIP	lncRNA	MIIP-206	806	0.928716	0.845325	3.17001	3.45729	0.000379926	0.0113555	0.887021	3.31365	0.0589667	0.203139
ENST00000636449.1	chr5	ENSG00000283498	miRNA	MIR1244-2	miRNA	MIR1244-2-201	85	9898.41	9983.52	4064.67	4556.88	0.000328759	0.0113555	9940.97	4310.77	60.1776	348.044
ENST00000408593.1	chr7	ENSG00000221520	miRNA	MIR1285-1	miRNA	MIR1285-1-201	84	4.45563	4.05555	16.8983	16.5868	0.000103279	0.0113555	4.25559	16.7426	0.2829	0.220307
ENST00000511335.5	chr6	ENSG00000146263	protein_coding	MMS22L	retained_intron	MMS22L-211	8380	9.87044	9.59393	4.37018	4.32285	6.22456e-07	0.0113555	9.73219	4.34652	0.195518	0.0334617
ENST00000285298.9	chr7	ENSG00000239789	protein_coding	MRPS17	protein_coding	MRPS17-201	1786	20.1177	18.1205	8.26561	9.04936	0.000545883	0.0113555	19.1191	8.65749	1.4122	0.554191
ENST00000313608.13	chr17	ENSG00000181610	protein_coding	MRPS23	protein_coding	MRPS23-201	5609	45.7748	47.7989	21.2577	23.3001	0.000574937	0.0113555	46.7869	22.2789	1.43124	1.4442
ENST00000361899.2	MT	ENSG00000198899	protein_coding	MT-ATP6	protein_coding	MT-ATP6-201	681	37872.4	39293.6	7879.78	8211.61	0.000196327	0.0113555	38583	8045.69	1004.94	234.641
ENST00000514057.1	chr1	ENSG00000248527	unprocessed_pseudogene	MTATP6P1	unprocessed_pseudogene	MTATP6P1-201	681	7859.18	8077.44	1636.65	1668.67	0.00178379	0.0113555	7968.31	1652.66	154.331	22.6423
ENST00000361851.1	MT	ENSG00000228253	protein_coding	MT-ATP8	protein_coding	MT-ATP8-201	207	18377.3	17818.3	4097.92	4244.48	1.65266e-06	0.0113555	18097.8	4171.2	395.288	103.636
ENST00000361624.2	MT	ENSG00000198804	protein_coding	MT-CO1	protein_coding	MT-CO1-201	1542	49162.3	50841	14982.4	17081.4	0.00101068	0.0113555	50001.6	16031.9	1187.03	1484.25
ENST00000414273.1	chr1	ENSG00000237973	unprocessed_pseudogene	MTCO1P12	unprocessed_pseudogene	MTCO1P12-201	1543	7054.18	7107.4	2139.22	2370.85	0.580605	0.614391	7080.79	2255.03	37.6327	163.788
ENST00000361739.1	MT	ENSG00000198712	protein_coding	MT-CO2	protein_coding	MT-CO2-201	684	34498.8	36423.4	10511.5	11315.8	0.499853	0.557026	35461.1	10913.6	1360.91	568.735
ENST00000362079.2	MT	ENSG00000198938	protein_coding	MT-CO3	protein_coding	MT-CO3-201	784	47070	48541	8838.68	9341.08	0.284739	0.332012	47805.5	9089.88	1040.11	355.254
ENST00000361789.2	MT	ENSG00000198727	protein_coding	MT-CYB	protein_coding	MT-CYB-201	1141	14507.7	14548.3	2814.54	2972.68	3.38359e-05	0.0113555	14528	2893.61	28.6911	111.821
ENST00000461101.1	chr4	ENSG00000163738	protein_coding	MTHFD2L	lncRNA	MTHFD2L-208	2363	17.4228	15.7142	4.56534	4.83494	0.000102831	0.0113555	16.5685	4.70014	1.20816	0.190638
ENST00000361390.2	MT	ENSG00000198888	protein_coding	MT-ND1	protein_coding	MT-ND1-201	956	40728	40900.9	12426.2	13033.7	0.00648901	0.0113555	40814.5	12729.9	122.289	429.531
ENST00000361453.3	MT	ENSG00000198763	protein_coding	MT-ND2	protein_coding	MT-ND2-201	1042	26828.4	28321	8545.37	8780.4	0.378063	0.432996	27574.7	8662.88	1055.47	166.189
ENST00000457540.1	chr1	ENSG00000225630	unprocessed_pseudogene	MTND2P28	unprocessed_pseudogene	MTND2P28-201	1044	7187.54	7453.86	2223.01	2254.35	0.025211	0.0335782	7320.7	2238.68	188.317	22.1658
ENST00000361227.2	MT	ENSG00000198840	protein_coding	MT-ND3	protein_coding	MT-ND3-201	346	11216.3	10725.1	2797.08	2915.44	1.84384e-05	0.0113555	10970.7	2856.26	347.34	83.6947
ENST00000361381.2	MT	ENSG00000198886	protein_coding	MT-ND4	protein_coding	MT-ND4-201	1378	30278.9	31139.5	9855.46	10490.9	0.00377635	0.0113555	30709.2	10173.2	608.578	449.337
ENST00000361335.1	MT	ENSG00000212907	protein_coding	MT-ND4L	protein_coding	MT-ND4L-201	297	18786.7	19189.7	6186.36	6562.06	0.000913446	0.0113555	18988.2	6374.21	284.947	265.661
ENST00000361567.2	MT	ENSG00000198786	protein_coding	MT-ND5	protein_coding	MT-ND5-201	1812	6485.74	6388.8	2315.32	2433.33	0.00227946	0.0113555	6437.27	2374.33	68.5459	83.4503
ENST00000361681.2	MT	ENSG00000198695	protein_coding	MT-ND6	protein_coding	MT-ND6-201	525	6327.7	6096.3	2484.19	2533.93	4.10854e-06	0.0113555	6212	2509.06	163.628	35.1699
ENST00000387405.1	MT	ENSG00000210140	Mt_tRNA	MT-TC	Mt_tRNA	MT-TC-201	66	9249.07	8738.6	4116.44	4589.41	0.00043255	0.0113555	8993.84	4352.92	360.96	334.444
ENST00000387459.1	MT	ENSG00000210194	Mt_tRNA	MT-TE	Mt_tRNA	MT-TE-201	69	244.091	227.111	78.1732	72.6933	5.91245e-05	0.0113555	235.601	75.4333	12.0069	3.87483
ENST00000386347.1	MT	ENSG00000209082	Mt_tRNA	MT-TL1	Mt_tRNA	MT-TL1-201	75	6063.22	6645.26	1885.04	1913.45	0.000425206	0.0113555	6354.24	1899.25	411.564	20.0869
ENST00000387456.1	MT	ENSG00000210191	Mt_tRNA	MT-TL2	Mt_tRNA	MT-TL2-201	71	347.916	398.243	87.9666	78.4952	0.000571581	0.0113555	373.079	83.2309	35.5871	6.69729
ENST00000387400.1	MT	ENSG00000210135	Mt_tRNA	MT-TN	Mt_tRNA	MT-TN-201	73	8603.15	8161.98	3900.6	4019.54	2.94013e-05	0.0113555	8382.56	3960.07	311.949	84.1065
ENST00000387449.1	MT	ENSG00000210184	Mt_tRNA	MT-TS2	Mt_tRNA	MT-TS2-201	59	539.206	594.722	76.9877	75.5682	0.000144625	0.0113555	566.964	76.278	39.2554	1.00371
ENST00000467451.1	X	ENSG00000102030	protein_coding	NAA10	retained_intron	NAA10-210	743	10.0746	9.62851	4.20298	4.50053	0.000114051	0.0113555	9.85157	4.35175	0.315456	0.210401
ENST00000493454.5	chr3	ENSG00000121579	protein_coding	NAA50	protein_coding	NAA50-206	964	0.38825	0.353388	1.76696	1.73438	6.34134e-05	0.0113555	0.370819	1.75067	0.024651	0.0230363
ENST00000501794.2	chr5	ENSG00000245711	lncRNA	NADK2-AS1	lncRNA	NADK2-AS1-201	720	2.07929	2.36574	7.0973	6.96645	0.000217641	0.0113555	2.22251	7.03187	0.202546	0.0925291
ENST00000509434.5	chr4	ENSG00000145414	protein_coding	NAF1	protein_coding	NAF1-205	385	4.86068	5.30908	19.9093	18.8185	0.000126964	0.0113555	5.08488	19.3639	0.317063	0.771357
ENST00000590358.1	chr17	ENSG00000108784	protein_coding	NAGLU	protein_coding	NAGLU-203	634	21.2521	23.1051	7.61225	7.91142	0.000339111	0.0113555	22.1786	7.76183	1.31029	0.211547
ENST00000261797.7	chr5	ENSG00000070614	protein_coding	NDST1	protein_coding	NDST1-201	8011	40.0389	37.6344	18.0024	17.9835	2.36341e-05	0.0113555	38.8367	17.993	1.70023	0.0133346
ENST00000252711.7	chr2	ENSG00000130414	protein_coding	NDUFA10	protein_coding	NDUFA10-201	4855	17.4995	18.4542	6.783	7.05971	0.000186676	0.0113555	17.9768	6.92136	0.6751	0.195664
ENST00000521840.1	chr8	ENSG00000156170	protein_coding	NDUFAF6	lncRNA	NDUFAF6-214	1057	107.643	101.201	32.4985	31.6357	1.091e-05	0.0113555	104.422	32.0671	4.55558	0.610106
ENST00000485064.1	chr3	ENSG00000065518	protein_coding	NDUFB4	protein_coding	NDUFB4-203	1426	4.19941	4.30013	17.7184	17.1963	1.18057e-05	0.0113555	4.24977	17.4573	0.0712184	0.369176
ENST00000274137.9	chr5	ENSG00000145494	protein_coding	NDUFS6	protein_coding	NDUFS6-201	1082	73.3326	65.4885	35.1585	31.9349	0.000745379	0.0113555	69.4105	33.5467	5.5466	2.27945
ENST00000369800.6	chr5	ENSG00000214357	protein_coding	NEURL1B	protein_coding	NEURL1B-201	6427	12.171	10.7601	4.72638	4.72595	0.000297912	0.0113555	11.4656	4.72617	0.997652	0.000302294
ENST00000577967.1	chr17	ENSG00000196712	protein_coding	NF1	retained_intron	NF1-218	5799	0.516327	0.528711	4.30807	3.94032	8.54072e-05	0.0113555	0.522519	4.1242	0.00875646	0.260036
ENST00000492085.1	chr1	ENSG00000163531	protein_coding	NFASC	lncRNA	NFASC-215	3937	2.66183	2.59588	7.64353	7.1487	9.41957e-05	0.0113555	2.62886	7.39611	0.0466359	0.349893
ENST00000568148.1	chr16	ENSG00000176953	protein_coding	NFATC2IP	protein_coding	NFATC2IP-206	1157	31.0546	27.9717	11.287	10.5972	0.000176631	0.0113555	29.5132	10.9421	2.17994	0.487757
ENST00000302101.6	chr1	ENSG00000171786	protein_coding	NHLH1	protein_coding	NHLH1-201	2557	155.008	136.693	507.83	544.674	0.000714086	0.0113555	145.85	526.252	12.9507	26.0525
ENST00000285814.9	chr2	ENSG00000155438	protein_coding	NIFK	protein_coding	NIFK-201	1686	18.4251	16.1645	6.73528	7.27221	0.000549522	0.0113555	17.2948	7.00374	1.59848	0.379666
ENST00000498730.5	chr3	ENSG00000114857	protein_coding	NKTR	retained_intron	NKTR-217	4912	0.609565	0.624184	3.58333	3.68745	1.32025e-05	0.0113555	0.616875	3.63539	0.0103377	0.0736259
ENST00000414613.1	chr2	ENSG00000237522	processed_pseudogene	NONOP2	processed_pseudogene	NONOP2-201	1231	4.56059	4.15109	12.2228	13.1293	0.000258367	0.0113555	4.35584	12.676	0.289564	0.640977
ENST00000378910.9	chr19	ENSG00000161270	protein_coding	NPHS1	protein_coding	NPHS1-202	4276	6.65218	7.09057	2.4565	2.15054	0.000417397	0.0113555	6.87138	2.30352	0.309987	0.216349
ENST00000333003.10	chr12	ENSG00000120798	protein_coding	NR2C1	protein_coding	NR2C1-202	4058	11.8978	11.9208	4.40739	4.60081	2.89657e-05	0.0113555	11.9093	4.5041	0.0162725	0.136764
ENST00000596878.1	chr19	ENSG00000160113	protein_coding	NR2F6	protein_coding	NR2F6-202	731	1.024	0.932055	3.49525	3.04961	0.001071	0.0113555	0.978028	3.27243	0.0650166	0.315118
ENST00000303212.2	chr19	ENSG00000171119	protein_coding	NRTN	protein_coding	NRTN-201	1109	31.0488	28.2608	7.42369	7.28681	4.14686e-05	0.0113555	29.6548	7.35525	1.97137	0.0967843
ENST00000561841.1	chr16	ENSG00000065057	protein_coding	NTHL1	nonsense_mediated_decay	NTHL1-202	1052	1.77886	1.94296	0.269859	0.264884	0.000148899	0.0113555	1.86091	0.267372	0.116036	0.00351822
ENST00000366627.4	chr1	ENSG00000135778	protein_coding	NTPCR	protein_coding	NTPCR-201	1762	6.15999	5.80022	15.9508	17.3963	0.00033618	0.0113555	5.9801	16.6736	0.254402	1.02215
ENST00000534682.1	chr1	ENSG00000198400	protein_coding	NTRK1	retained_intron	NTRK1-210	844	15.0773	14.5308	1.34546	1.32065	1.27618e-06	0.0113555	14.8041	1.33306	0.386477	0.0175411
ENST00000491614.6	chr10	ENSG00000165609	protein_coding	NUDT5	protein_coding	NUDT5-207	3195	105.663	113.662	49.4923	54.7722	0.00115044	0.0113555	109.663	52.1322	5.65595	3.73344
ENST00000548367.2	chr7	ENSG00000136243	protein_coding	NUP42	protein_coding	NUP42-212	249	12.0248	13.6814	5.70064	5.59554	0.00143745	0.0113555	12.8531	5.64809	1.17135	0.0743206
ENST00000381736.8	chr13	ENSG00000139496	protein_coding	NUP58	protein_coding	NUP58-202	4236	96.1305	93.7716	43.4282	42.9565	1.2481e-07	0.0113555	94.951	43.1924	1.66798	0.333605
ENST00000498767.1	chr1	ENSG00000143748	protein_coding	NVL	retained_intron	NVL-224	581	7.73025	7.03613	2.44313	2.39809	0.000100379	0.0113555	7.38319	2.42061	0.490814	0.0318517
ENST00000234111.9	chr2	ENSG00000115758	protein_coding	ODC1	protein_coding	ODC1-201	2476	50.3364	53.9342	23.0462	25.885	0.00117935	0.0113555	52.1353	24.4656	2.54405	2.00737
ENST00000488909.1	chr9	ENSG00000136811	protein_coding	ODF2	retained_intron	ODF2-217	1525	16.4435	16.7541	6.14324	5.66452	8.76285e-05	0.0113555	16.5988	5.90388	0.219632	0.338505
ENST00000382617.4	chr10	ENSG00000182531	unprocessed_pseudogene	OR7E115P	unprocessed_pseudogene	OR7E115P-201	1024	2.92401	3.32682	0.554477	0.544254	0.000399878	0.0113555	3.12541	0.549365	0.28483	0.00722884
ENST00000488761.1	chr2	ENSG00000115947	protein_coding	ORC4	lncRNA	ORC4-210	738	6.08574	6.92411	18.0798	18.1241	0.000332726	0.0113555	6.50492	18.102	0.592817	0.031282
ENST00000520651.1	chr2	ENSG00000253559	lncRNA	OSGEPL1-AS1	lncRNA	OSGEPL1-AS1-201	508	2.94703	2.68241	0.558843	0.548539	9.37665e-05	0.0113555	2.81472	0.553691	0.187115	0.00728576
ENST00000376495.4	chr10	ENSG00000165312	protein_coding	OTUD1	protein_coding	OTUD1-201	2933	4.46626	4.99442	14.3253	14.4412	0.000186692	0.0113555	4.73034	14.3832	0.373465	0.0819608
ENST00000274217.4	chr5	ENSG00000145569	protein_coding	OTULINL	protein_coding	OTULINL-201	7040	12.4403	13.7428	5.5246	5.10609	0.000822702	0.0113555	13.0915	5.31535	0.920978	0.295936
ENST00000303305.11	chr12	ENSG00000170515	protein_coding	PA2G4	protein_coding	PA2G4-201	2386	222.273	219.734	103.991	109.781	6.37956e-05	0.0113555	221.004	106.886	1.79578	4.09467
ENST00000574213.1	chr17	ENSG00000007168	protein_coding	PAFAH1B1	lncRNA	PAFAH1B1-207	634	15.3487	15.0452	40.7479	42.6338	6.09744e-05	0.0113555	15.197	41.6908	0.214635	1.3335
ENST00000220597.4	chr8	ENSG00000076641	protein_coding	PAG1	protein_coding	PAG1-201	10744	1.74178	1.80733	6.2359	5.47252	0.000643644	0.0113555	1.77455	5.85421	0.0463545	0.539789
ENST00000306846.8	chr5	ENSG00000172239	protein_coding	PAIP1	protein_coding	PAIP1-201	2780	17.502	18.1362	6.43353	6.91633	0.000160302	0.0113555	17.8191	6.67493	0.448456	0.341393
ENST00000527384.1	chr14	ENSG00000129484	protein_coding	PARP2	retained_intron	PARP2-203	429	6.10701	6.35275	13.8968	14.2901	0.000146838	0.0113555	6.22988	14.0935	0.173758	0.278127
ENST00000464256.1	chr21	ENSG00000159086	protein_coding	PAXBP1	retained_intron	PAXBP1-206	1692	28.0926	29.3955	82.5502	81.3575	3.22025e-05	0.0113555	28.7441	81.9539	0.921326	0.843316
ENST00000553064.6	chr12	ENSG00000197111	protein_coding	PCBP2	protein_coding	PCBP2-225	1786	25.3567	22.5076	79.4771	75.3593	0.000114055	0.0113555	23.9321	77.4182	2.01459	2.91169
ENST00000493650.5	chr13	ENSG00000126226	protein_coding	PCID2	lncRNA	PCID2-215	4202	17.1015	18.9709	46.5497	46.023	0.000236632	0.0113555	18.0362	46.2863	1.32191	0.372417
ENST00000300035.9	chr15	ENSG00000166803	protein_coding	PCLAF	protein_coding	PCLAF-201	2132	71.9755	66.4714	12.3837	12.6781	1.84587e-05	0.0113555	69.2235	12.5309	3.892	0.208234
ENST00000470490.1	chr3	ENSG00000081154	protein_coding	PCNP	lncRNA	PCNP-205	589	6.35438	6.36218	18.7976	17.0317	0.000368788	0.0113555	6.35828	17.9147	0.00552047	1.24867
ENST00000350498.8	chr7	ENSG00000106244	protein_coding	PDAP1	protein_coding	PDAP1-201	2604	69.8527	60.8332	28.9997	29.6422	0.000646825	0.0113555	65.343	29.321	6.37777	0.454278
ENST00000261313.3	chr12	ENSG00000089220	protein_coding	PEBP1	protein_coding	PEBP1-201	1431	475.753	421.131	199.776	191.03	0.000488746	0.0113555	448.442	195.403	38.6235	6.18458
ENST00000454592.5	chr7	ENSG00000006576	protein_coding	PHTF2	lncRNA	PHTF2-209	1563	0.478916	0.435913	2.54286	2.31769	0.000204508	0.0113555	0.457414	2.43028	0.0304076	0.159218
ENST00000440955.1	X	ENSG00000224294	lncRNA	PINCR	lncRNA	PINCR-201	2228	6.71944	7.0335	2.5484	2.37635	0.000155656	0.0113555	6.87647	2.46237	0.222074	0.121663
ENST00000564440.5	chr15	ENSG00000067225	protein_coding	PKM	retained_intron	PKM-212	3016	22.4613	23.6072	48.4763	47.4901	0.000133222	0.0113555	23.0342	47.9832	0.810224	0.697328
ENST00000316981.8	chr8	ENSG00000181690	protein_coding	PLAG1	protein_coding	PLAG1-201	7311	7.01345	6.29051	17.5515	15.7796	0.000811355	0.0113555	6.65198	16.6655	0.5112	1.25297
ENST00000280800.5	chr12	ENSG00000151176	protein_coding	PLBD2	protein_coding	PLBD2-201	4787	23.7683	23.4844	10.1411	10.187	2.72269e-06	0.0113555	23.6264	10.1641	0.200764	0.0324346
ENST00000481451.1	chr10	ENSG00000107679	protein_coding	PLEKHA1	retained_intron	PLEKHA1-207	8619	1.78039	1.8972	5.59945	5.33456	0.000113826	0.0113555	1.8388	5.467	0.0825971	0.187307
ENST00000510738.2	chr12	ENSG00000052126	protein_coding	PLEKHA5	lncRNA	PLEKHA5-204	2534	8.56662	8.60403	2.0166	2.08938	1.01803e-05	0.0113555	8.58533	2.05299	0.0264548	0.051468
ENST00000561456.5	chr14	ENSG00000054690	protein_coding	PLEKHH1	retained_intron	PLEKHH1-216	595	9.43545	8.58822	2.86278	2.81	8.63951e-05	0.0113555	9.01183	2.83639	0.599082	0.0373227
ENST00000447944.7	chr2	ENSG00000138035	protein_coding	PNPT1	protein_coding	PNPT1-205	4549	9.37944	8.76191	3.55723	4.04296	0.000465173	0.0113555	9.07068	3.8001	0.436664	0.34346
ENST00000263857.11	chr2	ENSG00000068654	protein_coding	POLR1A	protein_coding	POLR1A-201	12480	20.543	21.6738	8.6669	9.80215	0.00080252	0.0113555	21.1084	9.23452	0.799572	0.802742
ENST00000272645.9	chr2	ENSG00000144231	protein_coding	POLR2D	protein_coding	POLR2D-201	5038	55.7175	51.0526	22.6528	24.6688	0.000329412	0.0113555	53.385	23.6608	3.29858	1.42555
ENST00000507355.5	chr7	ENSG00000168255	protein_coding	POLR2J3	nonsense_mediated_decay	POLR2J3-209	532	121.005	124.868	40.0224	38.2369	5.23802e-05	0.0113555	122.937	39.1296	2.73134	1.26254
ENST00000353107.8	chr8	ENSG00000147669	protein_coding	POLR2K	protein_coding	POLR2K-201	947	30.0367	31.6564	10.7921	12.0644	0.000398515	0.0113555	30.8465	11.4282	1.14532	0.899643
ENST00000377208.7	chr13	ENSG00000152192	protein_coding	POU4F1	protein_coding	POU4F1-201	4539	9.64748	10.5074	4.50325	4.543	0.000571314	0.0113555	10.0775	4.52312	0.608079	0.0281115
ENST00000468812.6	chr7	ENSG00000196262	protein_coding	PPIA	protein_coding	PPIA-204	2237	123.308	120.002	40.8642	40.1108	2.49918e-07	0.0113555	121.655	40.4875	2.33728	0.532756
ENST00000358455.4	chr21	ENSG00000198618	processed_pseudogene	PPIAP22	processed_pseudogene	PPIAP22-201	498	892.092	902.97	304.984	303.838	1.82851e-05	0.0113555	897.531	304.411	7.69206	0.810835
ENST00000414949.2	chr6	ENSG00000214975	processed_pseudogene	PPIAP29	processed_pseudogene	PPIAP29-201	499	474.779	447.849	168.401	161.945	1.65868e-05	0.0113555	461.314	165.173	19.0419	4.56471
ENST00000225174.8	chr10	ENSG00000108179	protein_coding	PPIF	protein_coding	PPIF-201	2196	91.0117	88.4242	38.7831	43.7782	0.000425312	0.0113555	89.718	41.2806	1.8296	3.5321
ENST00000325658.3	chr14	ENSG00000100614	protein_coding	PPM1A	protein_coding	PPM1A-202	4125	11.7953	12.7182	29.3871	32.4932	0.00105103	0.0113555	12.2567	30.9402	0.652613	2.19632
ENST00000498165.6	chr3	ENSG00000163590	protein_coding	PPM1L	protein_coding	PPM1L-205	10906	6.76066	7.62172	15.0718	16.1482	0.00142951	0.0113555	7.19119	15.61	0.608865	0.761066
ENST00000367188.5	chr1	ENSG00000158615	protein_coding	PPP1R15B	protein_coding	PPP1R15B-201	5259	115.079	114.592	248.318	253.012	4.5018e-05	0.0113555	114.835	250.665	0.34433	3.31941
ENST00000298510.4	chr10	ENSG00000165672	protein_coding	PRDX3	protein_coding	PRDX3-201	1553	165.326	162.326	65.626	74.2848	0.000332544	0.0113555	163.826	69.9554	2.12099	6.12268
ENST00000265462.9	chr11	ENSG00000126432	protein_coding	PRDX5	protein_coding	PRDX5-201	860	53.9649	51.8921	23.7677	26.8937	0.000589766	0.0113555	52.9285	25.3307	1.46566	2.21043
ENST00000334494.8	chr21	ENSG00000160310	protein_coding	PRMT2	protein_coding	PRMT2-202	1334	1.40282	1.53223	5.32032	5.84889	0.000418787	0.0113555	1.46753	5.5846	0.0915063	0.373758
ENST00000476970.1	chr1	ENSG00000117360	protein_coding	PRPF3	lncRNA	PRPF3-205	1005	27.9308	30.5074	59.3207	60.9997	0.000560681	0.0113555	29.2191	60.1602	1.82193	1.18723
ENST00000573716.1	chr17	ENSG00000174231	protein_coding	PRPF8	retained_intron	PRPF8-208	542	1.38108	1.25707	9.95194	9.76845	1.28483e-05	0.0113555	1.31908	9.86019	0.0876884	0.129746
ENST00000576407.1	chr17	ENSG00000174231	protein_coding	PRPF8	retained_intron	PRPF8-213	566	0.661259	0.601883	18.0567	20.1855	0.000237466	0.0113555	0.631571	19.1211	0.0419851	1.50523
ENST00000320152.11	chr10	ENSG00000099256	protein_coding	PRTFDC1	protein_coding	PRTFDC1-201	1939	107.128	98.9144	32.0641	35.2095	0.000132891	0.0113555	103.021	33.6368	5.80798	2.22409
ENST00000373237.4	chr1	ENSG00000126067	protein_coding	PSMB2	protein_coding	PSMB2-201	4426	30.1042	31.2495	13.0208	13.7881	0.000208379	0.0113555	30.6769	13.4044	0.809881	0.542548
ENST00000580063.1	chr17	ENSG00000087191	protein_coding	PSMC5	retained_intron	PSMC5-207	562	2.66386	2.42467	0.505146	0.495832	9.37665e-05	0.0113555	2.54427	0.500489	0.169136	0.0065857
ENST00000356126.8	chr17	ENSG00000197170	protein_coding	PSMD12	protein_coding	PSMD12-201	4356	36.6024	40.8236	13.3604	13.3699	0.0006147	0.0113555	38.713	13.3652	2.98482	0.006755
ENST00000254630.12	chr2	ENSG00000132300	protein_coding	PTCD3	protein_coding	PTCD3-201	6681	60.7262	60.6784	20.9063	23.649	0.000207481	0.0113555	60.7023	22.2776	0.0337765	1.93939
ENST00000655438.1	chr5	ENSG00000250337	lncRNA	PURPL	lncRNA	PURPL-213	744	0.503055	0.457884	3.81575	3.7454	2.15243e-05	0.0113555	0.48047	3.78058	0.0319403	0.0497468
ENST00000413361.2	X	ENSG00000225125	processed_pseudogene	RANP4	processed_pseudogene	RANP4-201	655	4.57127	4.68091	14.7364	14.0392	5.8312e-05	0.0113555	4.62609	14.3878	0.0775247	0.492947
ENST00000374114.8	chr20	ENSG00000244462	protein_coding	RBM12	protein_coding	RBM12-203	6646	4.78682	4.357	1.28149	1.25786	4.8832e-05	0.0113555	4.57191	1.26967	0.303928	0.016707
ENST00000491240.5	X	ENSG00000102317	protein_coding	RBM3	lncRNA	RBM3-211	951	5.5098	5.01506	12.5378	11.4276	0.000668909	0.0113555	5.26243	11.9827	0.349832	0.785038
ENST00000472734.1	chr1	ENSG00000117625	protein_coding	RCOR3	lncRNA	RCOR3-205	452	13.2486	14.32	4.39656	4.932	0.000511344	0.0113555	13.7843	4.66428	0.757621	0.378612
ENST00000226193.6	chr17	ENSG00000109047	protein_coding	RCVRN	protein_coding	RCVRN-201	2469	46.8409	41.2552	15.0627	16.2522	0.000375971	0.0113555	44.0481	15.6575	3.9497	0.841101
ENST00000473945.1	chr7	ENSG00000189056	protein_coding	RELN	lncRNA	RELN-206	688	4.35201	3.96123	13.2043	12.1508	0.000263303	0.0113555	4.15662	12.6775	0.276321	0.74494
ENST00000462119.5	chr6	ENSG00000009413	protein_coding	REV3L	lncRNA	REV3L-209	2518	2.37822	2.43526	5.63725	6.30798	0.000969232	0.0113555	2.40674	5.97262	0.0403326	0.474276
ENST00000526104.5	chr11	ENSG00000177963	protein_coding	RIC8A	protein_coding	RIC8A-203	3703	5.15472	4.50787	1.53331	1.42979	0.00027791	0.0113555	4.83129	1.48155	0.45739	0.0732012
ENST00000372684.8	chr1	ENSG00000117016	protein_coding	RIMS3	protein_coding	RIMS3-202	7259	17.9428	18.8659	40.0867	38.0424	0.000306955	0.0113555	18.4044	39.0646	0.652733	1.44553
ENST00000462921.3	chr9	ENSG00000243738	misc_RNA	RN7SL181P	misc_RNA	RN7SL181P-201	277	4.0535	3.68952	1.02488	1.00598	0.000157119	0.0113555	3.87151	1.01543	0.257367	0.0133616
ENST00000574548.1	chr17	ENSG00000108523	protein_coding	RNF167	retained_intron	RNF167-210	440	4.2531	4.64545	16.1302	17.0995	0.000183487	0.0113555	4.44927	16.6148	0.27743	0.685347
ENST00000583556.1	chr18	ENSG00000067900	protein_coding	ROCK1	retained_intron	ROCK1-204	672	3.89867	3.5486	11.8288	11.1961	0.000111565	0.0113555	3.72364	11.5125	0.247537	0.447431
ENST00000585756.1	chr19	ENSG00000267119	processed_pseudogene	RPL10P15	processed_pseudogene	RPL10P15-201	315	4.75267	5.4074	1.80249	1.76926	0.000888092	0.0113555	5.08003	1.78587	0.462962	0.0234995
ENST00000469465.1	chr11	ENSG00000240970	processed_pseudogene	RPL23AP64	processed_pseudogene	RPL23AP64-201	435	9.46437	8.61454	20.2314	18.5772	0.000702033	0.0113555	9.03946	19.4043	0.600918	1.1697
ENST00000603609.1	chr2	ENSG00000270723	processed_pseudogene	RPL23AP92	processed_pseudogene	RPL23AP92-201	255	1.46774	1.33595	4.45321	4.3711	0.000208241	0.0113555	1.40184	4.41216	0.0931905	0.0580575
ENST00000298289.7	chr14	ENSG00000165502	protein_coding	RPL36AL	protein_coding	RPL36AL-201	676	561.409	509.991	260.374	262.581	0.000213267	0.0113555	535.7	261.478	36.358	1.56061
ENST00000491306.6	chr2	ENSG00000197756	protein_coding	RPL37A	protein_coding	RPL37A-210	2992	31.2728	29.831	10.9116	11.5487	3.26714e-05	0.0113555	30.5519	11.2301	1.01947	0.450446
ENST00000482846.1	chr15	ENSG00000185088	protein_coding	RPS27L	retained_intron	RPS27L-206	2944	8.26349	8.67865	20.829	19.8771	0.000151339	0.0113555	8.47107	20.3531	0.29356	0.673131
ENST00000600659.3	chr19	ENSG00000233927	protein_coding	RPS28	protein_coding	RPS28-203	1330	40.2414	35.6034	8.75156	8.79972	0.000102939	0.0113555	37.9224	8.77564	3.2795	0.034055
ENST00000622976.1	chr12	ENSG00000241749	transcribed_processed_pseudogene	RPSAP52	TEC	RPSAP52-203	1023	9.87817	10.9892	54.3918	57.4749	0.000106343	0.0113555	10.4337	55.9334	0.785637	2.18004
ENST00000474456.1	chr1	ENSG00000116954	protein_coding	RRAGC	retained_intron	RRAGC-202	2492	0.450569	0.410112	2.96196	2.79552	4.65596e-05	0.0113555	0.43034	2.87874	0.0286078	0.117685
ENST00000232888.7	chr3	ENSG00000114767	protein_coding	RRP9	protein_coding	RRP9-201	1542	356.797	324.759	135.871	152.882	0.00055326	0.0113555	340.778	144.376	22.654	12.0292
ENST00000391440.3	X	ENSG00000212747	protein_coding	RTL8B	protein_coding	RTL8B-201	2030	49.5957	44.3034	21.9562	20.3159	0.000458994	0.0113555	46.9496	21.1361	3.74228	1.15983
ENST00000530237.1	chr11	ENSG00000166788	protein_coding	SAAL1	retained_intron	SAAL1-206	471	10.3302	11.5725	55.4524	50.2886	0.000262104	0.0113555	10.9514	52.8705	0.878419	3.65137
ENST00000586281.1	chr19	ENSG00000160633	protein_coding	SAFB	retained_intron	SAFB-203	397	6.59927	6.0067	27.8886	26.6725	3.88003e-05	0.0113555	6.30299	27.2806	0.419005	0.859915
ENST00000590485.1	chr19	ENSG00000160633	protein_coding	SAFB	retained_intron	SAFB-208	548	20.4894	20.5146	53.8773	51.867	2.84384e-05	0.0113555	20.502	52.8721	0.0178005	1.42154
ENST00000592396.1	chr19	ENSG00000160633	protein_coding	SAFB	retained_intron	SAFB-212	620	16.9026	15.3849	36.6312	37.7536	0.000131048	0.0113555	16.1438	37.1924	1.07319	0.793662
ENST00000435732.5	chr21	ENSG00000155307	protein_coding	SAMSN1	lncRNA	SAMSN1-205	1151	134.296	128.453	27.6246	30.2626	2.47514e-05	0.0113555	131.374	28.9436	4.13182	1.86534
ENST00000468588.1	chr1	ENSG00000031698	protein_coding	SARS	lncRNA	SARS-203	1582	19.1631	19.5958	54.7327	49.1438	0.000556825	0.0113555	19.3795	51.9382	0.305957	3.95191
ENST00000471705.1	chr1	ENSG00000031698	protein_coding	SARS	lncRNA	SARS-204	851	19.3514	21.6169	43.3678	44.5329	0.000735249	0.0113555	20.4841	43.9503	1.60197	0.823847
ENST00000532333.5	chr11	ENSG00000175467	protein_coding	SART1	retained_intron	SART1-207	873	0.42872	0.390224	6.50383	6.70311	1.74785e-05	0.0113555	0.409472	6.60347	0.0272206	0.140914
ENST00000638372.1	chr4	ENSG00000138760	protein_coding	SCARB2	retained_intron	SCARB2-208	4811	1.01134	1.13296	5.31081	4.86536	0.000217026	0.0113555	1.07215	5.08808	0.0859978	0.314976
ENST00000640957.1	chr4	ENSG00000138760	protein_coding	SCARB2	protein_coding	SCARB2-227	3255	2.18469	2.40716	6.97738	7.10556	0.000147168	0.0113555	2.29593	7.04147	0.157309	0.0906388
ENST00000176195.4	chr11	ENSG00000070031	protein_coding	SCT	protein_coding	SCT-201	526	0.711545	0.647654	5.39719	5.82745	0.000135369	0.0113555	0.6796	5.61232	0.0451779	0.304238
ENST00000302190.9	chr8	ENSG00000169439	protein_coding	SDC2	protein_coding	SDC2-201	3307	25.9173	25.9594	6.26674	5.89841	1.12708e-05	0.0113555	25.9384	6.08258	0.0298002	0.26045
ENST00000652578.1	chr5	ENSG00000185986	transcribed_unprocessed_pseudogene	SDHAP3	lncRNA	SDHAP3-203	2585	44.3046	46.125	23.2824	20.4816	0.000864062	0.0113555	45.2148	21.882	1.28719	1.98048
ENST00000643391.1	chr1	ENSG00000277406	transcribed_unprocessed_pseudogene	SEC22B4P	lncRNA	SEC22B4P-202	1466	15.3181	13.4779	6.77778	6.08257	0.000869305	0.0113555	14.398	6.43018	1.30122	0.491585
ENST00000336735.9	chr14	ENSG00000071537	protein_coding	SEL1L	protein_coding	SEL1L-201	7919	19.6613	17.6807	39.0759	38.3907	0.000130594	0.0113555	18.671	38.7333	1.40044	0.48456
ENST00000558848.1	chr15	ENSG00000185033	protein_coding	SEMA4B	retained_intron	SEMA4B-205	639	2.34287	2.13249	6.66413	6.97735	0.000149547	0.0113555	2.23768	6.82074	0.148755	0.221476
ENST00000649490.1	chr11	ENSG00000149257	protein_coding	SERPINH1	nonsense_mediated_decay	SERPINH1-216	3523	0.106237	0.0966977	7.73592	6.88142	0.000241822	0.0113555	0.101467	7.30867	0.00674526	0.604223
ENST00000373019.5	chr1	ENSG00000183431	protein_coding	SF3A3	protein_coding	SF3A3-201	2774	102.675	107.21	45.1321	46.0077	0.000167232	0.0113555	104.943	45.5699	3.20667	0.619135
ENST00000357214.6	chr1	ENSG00000116560	protein_coding	SFPQ	protein_coding	SFPQ-201	3740	306.223	314.16	103.537	114.294	0.000194968	0.0113555	310.191	108.916	5.61193	7.60657
ENST00000521435.1	chr8	ENSG00000104205	protein_coding	SGK3	lncRNA	SGK3-215	597	2.50769	2.85315	0.475531	0.466764	0.000377192	0.0113555	2.68042	0.471147	0.244276	0.0061996
ENST00000373212.6	X	ENSG00000131171	protein_coding	SH3BGRL	protein_coding	SH3BGRL-201	1764	56.6501	56.9708	22.6921	26.0649	0.000552679	0.0113555	56.8105	24.3785	0.22674	2.38499
ENST00000624152.1	chr17	ENSG00000129214	protein_coding	SHBG	TEC	SHBG-221	164	6.84645	6.23169	1.73105	1.69913	0.000157119	0.0113555	6.53907	1.71509	0.434699	0.0225681
ENST00000494058.5	chr6	ENSG00000204351	protein_coding	SKIV2L	retained_intron	SKIV2L-215	867	5.18025	4.7151	11.4605	12.2134	0.00036167	0.0113555	4.94767	11.8369	0.328907	0.53239
ENST00000609923.6	chr10	ENSG00000122912	protein_coding	SLC25A16	protein_coding	SLC25A16-207	6581	26.616	23.8637	6.98838	7.79107	0.000243374	0.0113555	25.2398	7.38972	1.94614	0.56759
ENST00000547444.1	chr12	ENSG00000075415	protein_coding	SLC25A3	retained_intron	SLC25A3-205	517	13.0308	11.8607	30.7504	35.0344	0.0012826	0.0113555	12.4457	32.8924	0.827358	3.02921
ENST00000577745.2	chr17	ENSG00000125434	protein_coding	SLC25A35	protein_coding	SLC25A35-202	1940	6.75234	7.37524	1.90237	1.72366	0.00029265	0.0113555	7.06379	1.81301	0.440457	0.126369
ENST00000463802.1	chr12	ENSG00000135502	protein_coding	SLC26A10	retained_intron	SLC26A10-203	577	5.83788	6.4945	0.492014	0.482943	0.000179851	0.0113555	6.16619	0.487478	0.464302	0.0064145
ENST00000480105.1	X	ENSG00000017483	protein_coding	SLC38A5	retained_intron	SLC38A5-206	894	10.0476	11.0507	3.81063	4.36377	0.00111972	0.0113555	10.5491	4.0872	0.709296	0.391127
ENST00000473577.1	chr13	ENSG00000139514	protein_coding	SLC7A1	lncRNA	SLC7A1-203	726	0.515527	0.469237	3.91036	3.45444	0.000354221	0.0113555	0.492382	3.6824	0.0327322	0.322386
ENST00000480144.5	chr15	ENSG00000137776	protein_coding	SLTM	retained_intron	SLTM-206	2277	1.47934	1.64573	7.60537	8.3218	0.000257534	0.0113555	1.56253	7.96358	0.117656	0.506594
ENST00000523028.5	chr16	ENSG00000185710	transcribed_unprocessed_pseudogene	SMG1P4	transcribed_unprocessed_pseudogene	SMG1P4-204	4131	7.06688	7.00959	17.7991	19.2922	0.000320129	0.0113555	7.03823	18.5457	0.0405102	1.0558
ENST00000532337.1	chr16	ENSG00000254634	unprocessed_pseudogene	SMG1P6	unprocessed_pseudogene	SMG1P6-201	2930	8.30298	8.60385	20.0565	20.2574	5.02485e-05	0.0113555	8.45341	20.157	0.212749	0.142015
ENST00000404933.7	X	ENSG00000102172	protein_coding	SMS	protein_coding	SMS-202	1703	70.547	69.6135	33.5069	30.9256	9.89258e-05	0.0113555	70.0802	32.2163	0.6601	1.82526
ENST00000606769.1	chr14	ENSG00000272533	snoRNA	SNORA28	snoRNA	SNORA28-201	126	2.97042	2.7037	18.0249	17.6926	3.30603e-05	0.0113555	2.83706	17.8587	0.1886	0.234995
ENST00000363485.1	chr3	ENSG00000200355	snoRNA	SNORA72	snoRNA	SNORA72.1-201	129	2.90134	2.64082	8.80286	8.64055	0.000208241	0.0113555	2.77108	8.7217	0.184214	0.114765
ENST00000560433.5	chr15	ENSG00000131876	protein_coding	SNRPA1	retained_intron	SNRPA1-211	2440	1.84069	1.81502	6.39921	6.39543	2.3208e-06	0.0113555	1.82785	6.39732	0.0181457	0.00267343
ENST00000215829.8	chr22	ENSG00000100028	protein_coding	SNRPD3	protein_coding	SNRPD3-201	3466	79.3683	81.1858	35.5479	39.1536	0.000388466	0.0113555	80.2771	37.3508	1.2852	2.54958
ENST00000600149.1	chr19	ENSG00000224543	processed_pseudogene	SNRPGP15	processed_pseudogene	SNRPGP15-201	222	37.0901	38.3633	14.0667	15.0626	0.000164955	0.0113555	37.7267	14.5647	0.900285	0.70418
ENST00000507678.5	chr4	ENSG00000129128	protein_coding	SPCS3	retained_intron	SPCS3-203	2655	5.07488	5.64569	24.9141	28.0232	0.000471273	0.0113555	5.36029	26.4686	0.403619	2.1985
ENST00000265295.9	chr5	ENSG00000040275	protein_coding	SPDL1	protein_coding	SPDL1-201	2529	15.9832	17.9156	6.62303	7.49258	0.00161456	0.0113555	16.9494	7.0578	1.36644	0.614867
ENST00000380765.2	chr7	ENSG00000214300	protein_coding	SPDYE3	retained_intron	SPDYE3-202	1903	5.70358	5.01243	1.64099	1.75717	0.000299143	0.0113555	5.358	1.69908	0.488718	0.0821482
ENST00000264228.9	chr4	ENSG00000128039	protein_coding	SRD5A3	protein_coding	SRD5A3-201	4061	10.783	9.47926	4.33423	3.97985	0.000530374	0.0113555	10.1311	4.15704	0.921912	0.250587
ENST00000573034.7	chr1	ENSG00000266028	protein_coding	SRGAP2	protein_coding	SRGAP2-203	6301	14.3151	14.3273	5.94727	5.97029	9.7466e-06	0.0113555	14.3212	5.95878	0.00861352	0.0162782
ENST00000445874.1	chr10	ENSG00000180581	processed_pseudogene	SRP9P1	processed_pseudogene	SRP9P1-201	261	1507.13	1345.7	393.751	422.791	0.000201911	0.0113555	1426.41	408.271	114.15	20.5347
ENST00000373715.11	chr6	ENSG00000112081	protein_coding	SRSF3	protein_coding	SRSF3-202	4228	35.2319	30.9403	10.0047	9.62253	0.000217217	0.0113555	33.0861	9.81362	3.03461	0.270245
ENST00000489378.5	chr7	ENSG00000106028	protein_coding	SSBP1	retained_intron	SSBP1-212	1434	4.17599	4.03858	14.056	14.5742	2.48816e-05	0.0113555	4.10728	14.3151	0.0971617	0.366374
ENST00000369664.1	chr1	ENSG00000007341	protein_coding	ST7L	protein_coding	ST7L-205	862	0.434191	0.395204	1.97605	1.93961	6.34134e-05	0.0113555	0.414698	1.95783	0.0275679	0.0257622
ENST00000467087.5	chr4	ENSG00000109689	protein_coding	STIM2	protein_coding	STIM2-204	5154	5.08325	4.9573	1.04656	0.973194	7.63962e-06	0.0113555	5.02028	1.00987	0.0890597	0.0518748
ENST00000462953.1	chr2	ENSG00000115694	protein_coding	STK25	retained_intron	STK25-221	453	4.95725	5.26415	0.626693	0.615139	6.78225e-05	0.0113555	5.1107	0.620916	0.217011	0.00817034
ENST00000553821.2	chr14	ENSG00000140022	protein_coding	STON2	protein_coding	STON2-201	1717	2.61577	2.97612	6.94436	6.32944	0.00136057	0.0113555	2.79594	6.6369	0.254804	0.434812
ENST00000249344.7	chr7	ENSG00000128578	protein_coding	STRIP2	protein_coding	STRIP2-201	5116	23.4103	21.841	8.98955	8.6604	3.5648e-05	0.0113555	22.6257	8.82497	1.1097	0.232743
ENST00000651342.1	chr2	ENSG00000163541	protein_coding	SUCLG1	nonsense_mediated_decay	SUCLG1-210	1328	1.69099	1.53915	4.48926	4.40649	6.2584e-05	0.0113555	1.61507	4.44787	0.107366	0.0585274
ENST00000272902.10	chr3	ENSG00000144455	protein_coding	SUMF1	protein_coding	SUMF1-201	2147	3.13782	3.49076	0.661137	0.648947	0.000266002	0.0113555	3.31429	0.655042	0.24956	0.00861938
ENST00000368324.5	chr1	ENSG00000132718	protein_coding	SYT11	protein_coding	SYT11-201	5182	33.2237	33.0016	105.021	98.7832	0.000123741	0.0113555	33.1127	101.902	0.157078	4.41112
ENST00000530769.5	chr11	ENSG00000166012	protein_coding	TAF1D	retained_intron	TAF1D-215	4358	4.89526	4.37753	12.0514	12.2129	8.48292e-05	0.0113555	4.6364	12.1321	0.366088	0.114165
ENST00000341864.6	X	ENSG00000187325	protein_coding	TAF9B	protein_coding	TAF9B-201	2657	40.4277	40.9004	16.775	17.8291	9.68293e-05	0.0113555	40.664	17.302	0.334305	0.74537
ENST00000265112.7	chr5	ENSG00000113407	protein_coding	TARS	protein_coding	TARS-201	4314	3.47031	3.79044	0.9213	0.904314	0.000203943	0.0113555	3.63038	0.912807	0.226369	0.0120112
ENST00000240619.2	chr12	ENSG00000121318	protein_coding	TAS2R10	protein_coding	TAS2R10-201	1042	0.359187	0.326935	2.45204	2.13941	0.000498257	0.0113555	0.343061	2.29573	0.0228057	0.221067
ENST00000566853.1	chr16	ENSG00000162065	protein_coding	TBC1D24	lncRNA	TBC1D24-203	2507	6.7181	6.93018	20.4964	19.007	0.000176453	0.0113555	6.82414	19.7517	0.149965	1.05318
ENST00000518684.1	chr8	ENSG00000156787	protein_coding	TBC1D31	protein_coding	TBC1D31-205	605	1.23727	1.12617	3.75394	3.68473	9.33915e-05	0.0113555	1.18172	3.71934	0.0785572	0.048941
ENST00000610202.2	chr2	ENSG00000272902	lncRNA	TBC1D8-AS1	lncRNA	TBC1D8-AS1-201	2478	3.47388	3.02448	1.14565	1.01207	0.000572464	0.0113555	3.24918	1.07886	0.317776	0.0944522
ENST00000474363.1	chr3	ENSG00000177565	protein_coding	TBL1XR1	retained_intron	TBL1XR1-215	6229	3.06436	3.44549	8.43154	7.33663	0.00228046	0.0113555	3.25493	7.88408	0.269498	0.774213
ENST00000565404.1	chr16	ENSG00000141002	protein_coding	TCF25	protein_coding	TCF25-215	477	0.784639	0.714184	5.35645	5.2577	2.61639e-05	0.0113555	0.749412	5.30707	0.0498188	0.0698333
ENST00000522653.5	chr5	ENSG00000081059	protein_coding	TCF7	retained_intron	TCF7-223	5340	2.17274	2.10524	0.531633	0.521831	2.17074e-06	0.0113555	2.13899	0.526732	0.0477334	0.00693102
ENST00000392872.8	chr12	ENSG00000139372	protein_coding	TDG	protein_coding	TDG-202	3183	60.0859	63.5739	29.7895	29.3278	0.000317451	0.0113555	61.8299	29.5586	2.46637	0.326468
ENST00000544060.1	chr12	ENSG00000139372	protein_coding	TDG	retained_intron	TDG-208	1139	0.657195	0.598184	3.24021	3.18047	2.6414e-05	0.0113555	0.62769	3.21034	0.0417271	0.0422433
ENST00000575320.1	chr16	ENSG00000090447	protein_coding	TFAP4	retained_intron	TFAP4-206	6491	2.53705	2.41421	6.25429	6.95464	0.000618718	0.0113555	2.47563	6.60446	0.0868622	0.495226
ENST00000578529.5	chr18	ENSG00000079134	protein_coding	THOC1	retained_intron	THOC1-205	2681	7.2593	8.00521	19.3779	20.8915	0.000622643	0.0113555	7.63225	20.1347	0.527435	1.07028
ENST00000307741.11	chr19	ENSG00000172009	protein_coding	THOP1	protein_coding	THOP1-201	4761	5.89592	6.22515	1.90812	1.87294	9.82839e-05	0.0113555	6.06053	1.89053	0.232804	0.0248765
ENST00000281030.2	chr11	ENSG00000151365	protein_coding	THRSP	protein_coding	THRSP-201	1174	22.6349	21.473	9.18901	9.73166	7.01979e-05	0.0113555	22.0539	9.46034	0.821594	0.383712
ENST00000369086.1	chr10	ENSG00000151923	protein_coding	TIAL1	protein_coding	TIAL1-201	490	19.0955	18.7714	39.3973	39.8083	1.2505e-05	0.0113555	18.9335	39.6028	0.229214	0.290617
ENST00000509052.2	chr12	ENSG00000086598	protein_coding	TMED2	protein_coding	TMED2-203	1975	8.33823	8.79694	22.1364	20.1762	0.000537663	0.0113555	8.56759	21.1563	0.324361	1.38604
ENST00000437139.7	chr17	ENSG00000179029	protein_coding	TMEM107	protein_coding	TMEM107-204	2263	4.96164	5.11827	1.63084	1.47764	0.000119356	0.0113555	5.03995	1.55424	0.110756	0.108332
ENST00000538055.1	chr12	ENSG00000188735	protein_coding	TMEM120B	lncRNA	TMEM120B-205	2444	17.611	18.3993	7.318	7.9812	0.000356187	0.0113555	18.0052	7.6496	0.557395	0.46895
ENST00000476750.1	chr3	ENSG00000145014	protein_coding	TMEM44	lncRNA	TMEM44-212	946	2.76946	2.8809	0.300097	0.294564	3.40571e-05	0.0113555	2.82518	0.297331	0.0787973	0.00391244
ENST00000560576.1	chr15	ENSG00000128872	protein_coding	TMOD2	retained_intron	TMOD2-204	2348	3.98502	3.77228	1.32999	1.18679	0.000112649	0.0113555	3.87865	1.25839	0.150427	0.101258
ENST00000233143.6	chr2	ENSG00000034510	protein_coding	TMSB10	protein_coding	TMSB10-201	461	2933.29	2585.66	944.049	994.343	0.000525162	0.0113555	2759.48	969.196	245.811	35.5633
ENST00000289373.5	X	ENSG00000158164	protein_coding	TMSB15A	protein_coding	TMSB15A-201	634	291.626	292.306	81.4958	87.0256	2.84916e-05	0.0113555	291.966	84.2607	0.481324	3.91016
ENST00000447595.1	chr1	ENSG00000186283	protein_coding	TOR3A	protein_coding	TOR3A-204	730	8.71594	7.93332	3.11115	3.05378	0.000111981	0.0113555	8.32463	3.08247	0.553398	0.0405607
ENST00000524774.1	chr11	ENSG00000175274	protein_coding	TP53I11	retained_intron	TP53I11-204	566	37.6918	39.7243	17.0536	18.7085	0.000614207	0.0113555	38.708	17.881	1.43721	1.17018
ENST00000562197.3	chr11	ENSG00000261594	protein_coding	TPBGL	protein_coding	TPBGL-201	2931	3.95853	4.068	1.35602	1.23594	0.000110237	0.0113555	4.01327	1.29598	0.0774065	0.0849052
ENST00000424846.3	chr19	ENSG00000241015	transcribed_processed_pseudogene	TPM3P9	lncRNA	TPM3P9-201	2920	18.8418	16.6833	6.51396	7.25274	0.000566588	0.0113555	17.7626	6.88335	1.5263	0.522394
ENST00000532353.1	chr6	ENSG00000231889	lncRNA	TRAF3IP2-AS1	lncRNA	TRAF3IP2-AS1-210	576	6.49779	6.50577	22.1791	19.835	0.000403304	0.0113555	6.50178	21.007	0.00564506	1.65749
ENST00000444294.7	chr1	ENSG00000119283	protein_coding	TRIM67	protein_coding	TRIM67-202	9320	3.85517	3.61866	12.5802	12.4678	3.07164e-06	0.0113555	3.73692	12.524	0.167236	0.0794439
ENST00000484775.1	chr1	ENSG00000180098	protein_coding	TRNAU1AP	lncRNA	TRNAU1AP-206	1008	1.85651	1.68981	6.4777	5.80537	0.000453211	0.0113555	1.77316	6.14153	0.117875	0.475405
ENST00000262067.5	chr7	ENSG00000106537	protein_coding	TSPAN13	protein_coding	TSPAN13-201	1873	92.7189	89.4862	37.1348	38.3843	1.03512e-05	0.0113555	91.1026	37.7596	2.28588	0.883473
ENST00000423978.1	chr8	ENSG00000227473	unitary_pseudogene	TSSK5P	unitary_pseudogene	TSSK5P-201	907	5.77709	5.25835	13.7721	13.8254	6.01305e-05	0.0113555	5.51772	13.7987	0.366803	0.0376953
ENST00000487711.5	chr21	ENSG00000182670	protein_coding	TTC3	lncRNA	TTC3-220	925	5.26005	5.52431	0.613821	0.602503	4.46198e-05	0.0113555	5.39218	0.608162	0.186863	0.00800252
ENST00000550811.1	chr12	ENSG00000167552	protein_coding	TUBA1A	protein_coding	TUBA1A-208	650	2.30322	2.09641	7.86163	7.71668	3.74016e-05	0.0113555	2.19981	7.78915	0.146237	0.102494
ENST00000355809.4	chr1	ENSG00000134744	protein_coding	TUT4	protein_coding	TUT4-202	2152	0.695674	0.633208	5.01296	5.43849	0.000121237	0.0113555	0.664441	5.22573	0.0441702	0.300892
ENST00000323813.3	chr18	ENSG00000176912	lncRNA	TYMSOS	lncRNA	TYMSOS-201	844	27.9374	25.4289	9.75459	9.24457	0.000106466	0.0113555	26.6831	9.49958	1.77382	0.360633
ENST00000496100.1	chr3	ENSG00000163714	protein_coding	U2SURP	retained_intron	U2SURP-216	540	6.23788	6.30863	16.2975	14.965	0.000349621	0.0113555	6.27325	15.6312	0.050028	0.942255
ENST00000590891.1	chr16	ENSG00000153443	protein_coding	UBALD1	protein_coding	UBALD1-205	2641	13.8882	12.1252	27.0885	31.0206	0.00275695	0.0113555	13.0067	29.0546	1.24664	2.78039
ENST00000628734.1	X	ENSG00000077721	protein_coding	UBE2A	retained_intron	UBE2A-208	600	4.9903	5.10999	25.0771	26.4725	5.19393e-05	0.0113555	5.05015	25.7748	0.0846312	0.98667
ENST00000265339.7	chr5	ENSG00000119048	protein_coding	UBE2B	protein_coding	UBE2B-201	2241	16.3671	16.1136	6.20737	6.96334	0.000252988	0.0113555	16.2404	6.58535	0.179264	0.534551
ENST00000566136.1	chr16	ENSG00000103353	protein_coding	UBFD1	retained_intron	UBFD1-205	2485	2.4098	2.74178	7.19726	6.72816	0.00061512	0.0113555	2.57579	6.96271	0.234741	0.331709
ENST00000367455.8	chr1	ENSG00000116750	protein_coding	UCHL5	protein_coding	UCHL5-206	5327	25.1529	26.7954	10.9784	12.6068	0.00125981	0.0113555	25.9742	11.7926	1.1614	1.15149
ENST00000459854.5	chr22	ENSG00000070010	protein_coding	UFD1	retained_intron	UFD1-205	5038	9.65769	9.60194	35.8387	32.6336	0.000239572	0.0113555	9.62982	34.2362	0.0394238	2.26634
ENST00000374279.4	chr9	ENSG00000148154	protein_coding	UGCG	protein_coding	UGCG-201	3959	42.2581	41.9917	93.7941	102.2	0.000779471	0.0113555	42.1249	97.9972	0.188416	5.94412
ENST00000478840.1	X	ENSG00000125351	protein_coding	UPF3B	retained_intron	UPF3B-203	748	5.00365	4.55436	1.51814	1.49015	0.000101339	0.0113555	4.779	1.50414	0.317695	0.0197923
ENST00000644544.1	chr7	ENSG00000284981	protein_coding	UPK3BL2	protein_coding	UPK3BL2-201	1005	77.8338	73.2178	16.6663	18.0226	2.84749e-05	0.0113555	75.5258	17.3445	3.26405	0.959081
ENST00000558218.5	chr15	ENSG00000140455	protein_coding	USP3	lncRNA	USP3-207	717	7.30798	7.1269	17.0256	16.3231	4.86324e-05	0.0113555	7.21744	16.6743	0.128037	0.496779
ENST00000261708.9	chr17	ENSG00000108651	protein_coding	UTP6	protein_coding	UTP6-201	4330	6.0506	5.97936	1.50797	1.41581	9.3484e-06	0.0113555	6.01498	1.46189	0.0503756	0.0651657
ENST00000459667.1	chr6	ENSG00000204394	protein_coding	VARS	retained_intron	VARS-218	793	0.471971	0.429591	2.14799	2.45978	0.000774565	0.0113555	0.450781	2.30388	0.0299667	0.220471
ENST00000497139.5	chr6	ENSG00000112715	protein_coding	VEGFA	retained_intron	VEGFA-215	2746	8.45044	8.56007	24.502	23.2384	6.28984e-05	0.0113555	8.50526	23.8702	0.0775198	0.893482
ENST00000495755.1	chr6	ENSG00000223501	protein_coding	VPS52	retained_intron	VPS52-221	453	2.47863	2.25607	0.626693	0.615139	0.000157119	0.0113555	2.36735	0.620916	0.157375	0.00817034
ENST00000330317.6	chr21	ENSG00000160193	protein_coding	WDR4	protein_coding	WDR4-201	1471	9.41407	9.49511	3.66686	4.16755	0.000422245	0.0113555	9.45459	3.91721	0.0573059	0.354045
ENST00000295121.11	chr2	ENSG00000243667	protein_coding	WDR92	protein_coding	WDR92-201	2591	12.2783	12.7536	5.14972	5.80761	0.000620386	0.0113555	12.516	5.47867	0.336065	0.465199
ENST00000272164.6	chr1	ENSG00000143816	protein_coding	WNT9A	protein_coding	WNT9A-201	4005	9.90585	9.69686	3.89864	3.68761	1.84214e-05	0.0113555	9.80135	3.79312	0.147775	0.149225
ENST00000542958.5	chr12	ENSG00000184575	protein_coding	XPOT	retained_intron	XPOT-206	1321	3.3999	3.86827	9.45591	10.3363	0.000999868	0.0113555	3.63409	9.8961	0.331188	0.622523
ENST00000384307.1	chr18	ENSG00000207034	misc_RNA	Y_RNA	misc_RNA	Y_RNA.470-201	117	9.59674	8.73503	24.2643	23.8169	0.000118966	0.0113555	9.16588	24.0406	0.609322	0.316339
ENST00000444752.1	chr9	ENSG00000213866	processed_pseudogene	YBX1P10	processed_pseudogene	YBX1P10-201	975	24.5676	24.8075	11.6469	12.0037	5.98122e-05	0.0113555	24.6876	11.8253	0.169582	0.252344
ENST00000603538.1	chr8	ENSG00000270673	lncRNA	YTHDF3-AS1	lncRNA	YTHDF3-AS1-201	718	4.17017	4.74465	1.58157	1.55241	0.000886114	0.0113555	4.45741	1.56699	0.40622	0.0206193
ENST00000264335.13	chr17	ENSG00000108953	protein_coding	YWHAE	protein_coding	YWHAE-201	2052	2.00634	1.82618	0.415047	0.407395	6.10438e-05	0.0113555	1.91626	0.411221	0.127388	0.00541106
ENST00000365361.1	X	ENSG00000202231	snoRNA	Z95327.1	snoRNA	Z95327.1-201	133	2.81408	2.5614	8.53811	8.38069	0.000208241	0.0113555	2.68774	8.4594	0.178673	0.111313
ENST00000624882.1	chr22	ENSG00000279345	lncRNA	Z98885.3	lncRNA	Z98885.3-201	1757	1.27811	1.35723	6.46311	7.29554	0.000426247	0.0113555	1.31767	6.87932	0.055951	0.588616
ENST00000487283.5	chr2	ENSG00000115085	protein_coding	ZAP70	retained_intron	ZAP70-205	3273	2.74444	2.49801	0.607163	0.595968	4.9598e-05	0.0113555	2.62122	0.601566	0.174252	0.00791572
ENST00000642217.1	chr5	ENSG00000250802	lncRNA	ZBED3-AS1	lncRNA	ZBED3-AS1-218	4156	9.54594	8.36091	1.91265	1.67624	0.000209792	0.0113555	8.95342	1.79444	0.837942	0.167169
ENST00000557491.1	chr14	ENSG00000100722	protein_coding	ZC3H14	retained_intron	ZC3H14-221	2724	3.29756	3.62677	12.0894	10.7412	0.000645484	0.0113555	3.46216	11.4153	0.232787	0.953298
ENST00000445547.1	chr2	ENSG00000065548	protein_coding	ZC3H15	protein_coding	ZC3H15-204	776	1.44693	1.31701	14.2678	12.9274	0.000135432	0.0113555	1.38197	13.5976	0.0918695	0.947768
ENST00000556761.1	chr14	ENSG00000165861	protein_coding	ZFYVE1	retained_intron	ZFYVE1-209	545	0.686739	0.625075	4.68813	4.09039	0.000498257	0.0113555	0.655907	4.38926	0.0436029	0.422663
ENST00000274712.8	chr5	ENSG00000146007	protein_coding	ZMAT2	protein_coding	ZMAT2-201	1544	54.541	62.6614	25.9254	25.0864	0.00172536	0.0113555	58.6012	25.5059	5.74193	0.593229
ENST00000311417.7	chr3	ENSG00000172667	protein_coding	ZMAT3	protein_coding	ZMAT3-201	8936	7.79037	8.80638	22.0162	21.7039	0.000323368	0.0113555	8.29838	21.8601	0.718431	0.22088
ENST00000396077.8	chr3	ENSG00000185219	protein_coding	ZNF445	protein_coding	ZNF445-201	18314	3.88292	4.0551	10.1379	9.90533	5.28264e-05	0.0113555	3.96901	10.0216	0.121752	0.164447
ENST00000372524.5	chr10	ENSG00000165655	protein_coding	ZNF503	protein_coding	ZNF503-201	3205	4.55433	4.0391	13.9067	12.0853	0.000997844	0.0113555	4.29672	12.996	0.364326	1.28793
ENST00000344519.10	chr19	ENSG00000160229	protein_coding	ZNF66	protein_coding	ZNF66-201	4539	24.6547	22.591	9.19413	10.498	0.000597051	0.0113555	23.6228	9.84607	1.45925	0.921989
ENST00000331410.10	chr7	ENSG00000198556	protein_coding	ZNF789	protein_coding	ZNF789-201	1616	14.8227	13.2809	3.51352	3.2763	0.000100205	0.0113555	14.0518	3.39491	1.0902	0.167738
ENST00000597334.1	chr19	ENSG00000231205	transcribed_unprocessed_pseudogene	ZNF826P	lncRNA	ZNF826P-204	1446	12.9417	13.4287	5.88988	5.58857	0.000156179	0.0113555	13.1852	5.73923	0.344421	0.213054
ENST00000425468.6	chr6	ENSG00000137185	protein_coding	ZSCAN9	protein_coding	ZSCAN9-202	1791	0.208974	0.19021	1.90212	2.02264	7.60929e-05	0.0113555	0.199592	1.96238	0.0132683	0.0852188
ENST00000358697.5	X	ENSG00000198205	protein_coding	ZXDA	protein_coding	ZXDA-201	4113	2.91192	2.98176	8.69691	8.73982	1.39998e-05	0.0113555	2.94684	8.71836	0.0493836	0.030337
ENST00000374888.2	X	ENSG00000198455	protein_coding	ZXDB	protein_coding	ZXDB-201	5894	9.01709	9.6524	22.6382	23.45	0.00020921	0.0113555	9.33474	23.0441	0.449229	0.574061
ENST00000514463.1	chr3	ENSG00000070476	protein_coding	ZXDC	retained_intron	ZXDC-203	4639	6.13165	6.02169	2.63146	2.34267	0.00020369	0.0113555	6.07667	2.48707	0.0777555	0.204206
