# Supplementary material for: Bisphenol A Exposure Changes the Transcriptomic and Proteomic Dynamics of Human Retinoblastoma Y79 Cells
Source: MDPI journal article supplement (doi:10.3390/genes12020264), 2021-02-11
Supplement: s1 [file Supplementary Table S3.xlsx]

## Sheet: Sheet1
Identification of differentially expressed proteins by BPA treatment in Y79 cells
Spot No.a)	Accession No.b)	Protein name (description)	Molecular function
Up-regulated
2406	gi|1710248	Protein disulfide isomerase family A, member 5 (PDIA5)	Electron carrier activity, protein disulfide oxidoreductase activity
2813	gi|5453832	Hypoxia up-regulated 1 (HYOU1)	ATP binding, chaperone binding
2824	gi|111305821	Valosin containing protein (VCP)	Lipid binding, protein domain specific binding
5008	gi|31543380	Parkinson protein 7 (PARK7)	Peptidase activity, protein homodimerization activity
6406	gi|62896709	TATA box binding protein (TBP)	Repressing transcription factor binding, transcription factor binding
7215	gi|378404908	Glyceraldehyde-3-phosphate dehydrogenase (GAPDH)	NADP binding, identical protein binding
8816	gi|14602585	Methylenetetrahydrofolate dehydrogenase (NADP+ dependent) 2, methenyltetrahydrofolate cyclohydrolase	Formate-tetrahydrofolate ligase activity, magnesium ion binding
		(MTHFD2)
8819	gi|194391174	Unnamed protein product
9201	gi|62897717	Lactate dehydrogenase A (LDHA)	L-lactate dehydrogenase activity
Down-regulated
14	gi|124504316	Histone Cluster 2, H4b1 (HIST2H4B)	Protein heterodimerization activity
a) Location of the protein resolved by 2D gel electrophoresis (Fig 5A), b) Protein accession number from the NCBI database
